# Supplementary material for: Lewis acid-catalysed one pot synthesis of substituted xanthenes
Source: Royal Society of Chemistry journal article supplement (doi:10.1039/c0ob00954g), 2010-12-15
Supplement: c0ob00954g.pdf [file c0ob00954g.pdf]

# Lewis-Acid Catalysed One Pot Synthesis of Substituted Xanthenes

Esther Böß, Tim Hillringhaus, Jacqueline Nitsch and Martin Klussmann

Max-Planck-Institut für Kohlenforschung, Kaiser Wilhelm Platz 1,  
45470 Mülheim an der Ruhr, Germany.  
Email:klusi@mpi-muelheim.mpg.de

## Supporting Information

|                              |       |
|------------------------------|-------|
| Experimental details         | p. 2  |
| Characterisation of products | p. 3  |
| NMR spectra of products      | p. 7  |
| IR spectra of products       | p. 26 |
| HPLC analysis                | p. 33 |
| X-ray analysis               | p. 46 |
| Optimisation studies         | p. 47 |

## Experimental details

Unless otherwise indicated, all reagents and solvents were purchased from commercial distributors and used as received. Solvents (toluene, hexanes, ethyl acetate, dichloromethane, methanol) used for column chromatography were of technical grade and used after distillation in a rotary evaporator. TLC was used to check the reactions for full conversion and was performed on Macherey-Nagel Polygram Sil G/UV<sub>254</sub> thin layer plates. TLC spots were visualized by UV-light irradiation. Flash column chromatography was carried out using Merck Silica Gel 60 (40-63  $\mu\text{m}$ ). Yields refer to pure isolated compounds. <sup>1</sup>H and <sup>13</sup>C NMR spectra were measured with Bruker AV 500 and AV 600 spectrometers. All chemical shifts are given in ppm downfield relative to TMS and were referenced to the solvent residual peaks.<sup>[7]</sup> <sup>1</sup>H NMR chemical shifts are designated using the following abbreviations as well as their combinations: s = singlet, d = doublet, t = triplet, q = quartet, m = multiplet, br = broad signal. High resolution mass spectra were recorded with a Bruker APEX III FTICR-MS or a Finnigan SSQ 7000 quadrupole MS or a Finnigan MAT 95 double focusing sector field MS instrument. Infrared spectra were measured with a PerkinElmer Spectrum 100 FT-IR spectrometer on a diamond ATR unit. High performance liquid chromatography (HPLC) was performed on a Shimadzu LC-20A HPLC-System. Microwave reactions were carried out in a CEM Discover Microwave with up to 300W. The reaction temperature (IR surface flask, air cooling upon heating), pressure (non-invasive pressure transducer) and microwave power were remotely controlled.

### General Procedure A – oil bath heating

Representative procedure: 5-Methoxysalicylaldehyde **1** (138.32 $\mu\text{L}$ , 1.1 mmol) and 2-cyclohexene-1-one **2** (96.81 $\mu\text{L}$ , 1.0 mmol) was quickly added to a suspension of scandium(III) triflate (24.61 mg, 0.05 mmol) in chlorobenzene (4.0 mL). The reaction mixture was refluxed for 24 hours and allowed to cool to room temperature. DCM (20 mL) and saturated aqueous NaHCO<sub>3</sub> (20 mL) were added to the reaction mixture and the two layers separated. The aqueous phase was extracted with DCM (3 $\times$  20 mL) and the combined organic layers were dried over MgSO<sub>4</sub>, filtered and solvent was removed by rotary evaporator. The crude product **3a** was purified with flash chromatography using mixtures of pentane and ethyl acetate.

### General Procedure B – microwave heating

Representative procedure: 5-Methoxysalicylaldehyde **1** (138.32 $\mu\text{L}$ , 1.1 mmol) and 2-cyclohexene-1-one **2** (96.81 $\mu\text{L}$ , 1.0 mmol) was quickly added to a suspension of scandium(III) triflate (24.61 mg, 0.05 mmol) in chlorobenzene (4.0 mL). The reaction mixture was heated in a microwave tube at 180 °C for 30 minutes. After compressed air cooling to room temperature, DCM (20 mL) and saturated aqueous NaHCO<sub>3</sub> (20 mL) were added to the reaction mixture and the two layers separated. The aqueous phase was extracted with DCM (3 $\times$  20 mL) and the combined organic layers were dried over MgSO<sub>4</sub>, filtered and solvent was removed by rotary evaporator. The crude product **3a** was purified with flash chromatography using mixtures of pentane and ethyl acetate.

## Characterisation of products

### 2-methoxy-9H-xanthene **3a**

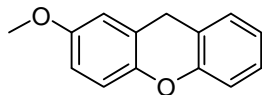

Synthesized according to general procedure A. Yield: 134 mg, 63%; Synthesized according to general procedure B. Yield: 174 mg, 82%; Yellowish solid,  $^1\text{H}$  NMR (500 MHz, DMSO):  $\delta$  7.25-7.18 (m, 2H), 7.06-6.98 (m, 3H), 6.83-6.77 (m, 2H), 4.01 (s, 2H), 3.73 (s, 3H);  $^{13}\text{C}$  NMR (125 MHz, DMSO):  $\delta$  155.0, 151.6, 145.2, 129.1, 127.7, 122.9, 121.4, 120.1, 116.8, 116.0, 113.5, 113.3, 55.4, 27.3; HRMS-(EI) ( $m/z$ ):  $M^+$  calcd for  $\text{C}_{14}\text{H}_{12}\text{O}_2$ , 212.083728; found 212.083561.

### 9H-xanthene **3b**

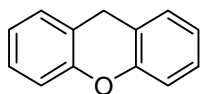

Synthesized according to general procedure A. Yield: 91 mg, 50%; Synthesized according to general procedure B. Yield: 102 mg, 56%; White solid,  $^1\text{H}$  NMR (500 MHz, DMSO):  $\delta$  7.27-7.20 (m, 4H), 7.09-7.04 (m, 4H), 4.04 (s, 2H);  $^{13}\text{C}$  NMR (125 MHz, DMSO): 151.31, 129.17, 127.75, 123.23, 120.61, 116.04, 26.90; HRMS-(EI) ( $m/z$ ):  $M^+$  calcd for  $\text{C}_{13}\text{H}_{10}\text{O}$ , 182.073166; found 182.072975.

### 4-methoxy-9H-xanthene **3c**

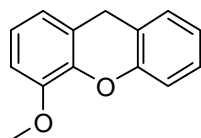

Synthesized according to general procedure A. Yield: 115 mg, 54%; Synthesized according to general procedure B. Yield: 132 mg, 62%; Yellowish oil,  $^1\text{H}$  NMR (500 MHz, DMSO):  $\delta$  7.26-7.19 (m, 2H), 7.10-7.04 (m, 2H), 7.02-6.97 (m, 1H), 6.94-6.90 (m, 1H), 6.83-6.79 (m, 1H), 4.02 (s, 2H), 3.83 (s, 3H);  $^{13}\text{C}$  NMR (125 MHz, DMSO): 151.2, 147.6, 140.6, 129.1, 127.7, 123.3, 122.9, 121.3, 120.5, 120.4, 116.2, 110.5, 55.6, 27.0; HRMS-(EI) ( $m/z$ ):  $M^+$  calcd for  $\text{C}_{14}\text{H}_{12}\text{O}_2$ , 212.083730; found 212.083684.

### 9H-xanthen-2-ol **3d**

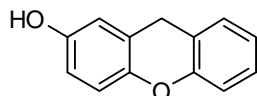

Synthesized according to general procedure A. Yield: 59 mg, 30%; Synthesized according to general procedure B. Yield: 109 mg, 55%; White solid,  $^1\text{H}$  NMR (500 MHz, DMSO):  $\delta$  9.18 (s, 1H), 7.25-7.17 (m, 2H), 7.06-6.99 (m, 2H), 6.90-6.89 (m, 1H), 6.64-6.59 (m, 2H), 3.96 (s, 2H);  $^{13}\text{C}$  NMR (125 MHz, DMSO): 153.03, 151.74, 144.08, 129.10, 127.61, 122.74, 121.22, 120.24, 116.68, 115.94, 114.64, 114.48, 27.30; HRMS-(EI) ( $m/z$ ):  $M^+$  calcd for  $\text{C}_{13}\text{H}_{10}\text{O}_2$ , 198.068079; found 198.067949

2-methyl-9H-xanthene **3e**

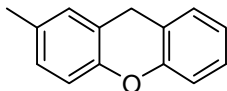

Synthesized according to general procedure A. Yield: 134 mg, 63%; Synthesized according to general procedure B. Yield: 187 mg, 88%; White solid,  $^1\text{H}$  NMR (500 MHz, DMSO):  $\delta$  7.26-7.19 (m, 2H), 7.07-6.99 (m, 4H), 6.97-6.93 (m, 1H), 4.00 (s, 2H), 2.26 (s, 3H);  $^{13}\text{C}$  NMR (125 MHz, DMSO):  $\delta$  151.4, 149.2, 132.1, 129.4, 129.2, 128.2, 127.7, 123.1, 120.5, 120.2, 116.0, 115.8, 26.9, 20.2; HRMS-(EI) ( $m/z$ ):  $M^+$  calcd for  $\text{C}_{14}\text{H}_{12}\text{O}_1$ , 196.088811; found 196.088659.

2-chloro-9H-xanthene **3f**

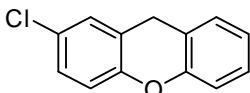

Synthesized according to general procedure A. Yield: 39 mg, 18%; Synthesized according to general procedure B. Yield: 65 mg, 30%; White solid,  $^1\text{H}$  NMR (500 MHz, DMSO):  $\delta$  7.34-7.32 (m, 1H), 7.27-7.21 (m, 3H), 7.09-7.04 (m, 3H), 4.04 (s, 2H);  $^{13}\text{C}$  NMR (125 MHz, DMSO):  $\delta$  150.9, 150.1, 129.1, 128.7, 127.9, 127.6, 126.7, 123.5, 122.8, 119.9, 117.8, 116.1, 26.7; HRMS-(EI) ( $m/z$ ):  $M^+$  calcd for  $\text{C}_{13}\text{H}_9\text{O}_1\text{Cl}_1$ , 216.034193; found 216.034201.

1,3-dimethyl-9H-xanthene **3g**

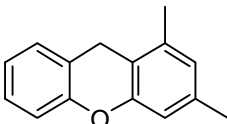

Synthesized according to general procedure A. Yield: 126 mg, 60%; Synthesized according to general procedure B. (at 200°C) Yield: 118 mg, 56%; White solid,  $^1\text{H}$  NMR (500 MHz, DMSO):  $\delta$  7.26-7.17 (m, 2H), 7.05-6.98 (m, 2H), 6.73 (s, 1H), 6.68 (s, 1H), 3.88 (s, 2H), 2.22 (s, 6H);  $^{13}\text{C}$  NMR (125 MHz, DMSO): 150.95, 150.80, 136.88, 136.45, 129.49, 127.71, 125.04, 122.93, 120.06, 115.83, 115.81, 113.94, 24.53, 20.56, 18.64; HRMS-(EI) ( $m/z$ ):  $M^+$  calcd for  $\text{C}_{15}\text{H}_{14}\text{O}_1$ , 210.104467; found 210.104383.

7-methoxy-1,3-dimethyl-9H-xanthene **3h**

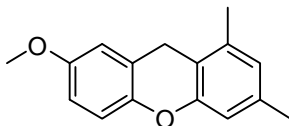

Synthesized according to general procedure A. Yield: 149 mg, 62%; Synthesized according to general procedure B. (at 200°C) Yield: 166 mg, 69%; White solid,  $^1\text{H}$  NMR (500 MHz, DMSO): 6.96-6.92 (m, 1H), 6.84-6.81 (m, 1H), 6.79-6.75 (m, 1H), 6.72 (s, 1H), 6.66 (s, 1H), 3.88 (s, 2H), 3.72 (s, 3H), 2.22 (s, 6H);  $^{13}\text{C}$  NMR (125 MHz, DMSO): 154.78, 151.07, 144.87, 136.81, 136.39, 124.79, 120.80, 116.59, 115.36, 113.87, 113.59, 55.36, 24.99, 20.58, 18.70; HRMS-(EI) ( $m/z$ ):  $M^+$  calcd for  $\text{C}_{16}\text{H}_{16}\text{O}_2$ , 240.115026; found 240.115225.

12*H*-benzo[*a*]xanthene **3i**

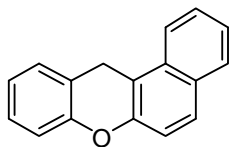

Synthesized according to general procedure A. Yield: 207 mg, 89%; Synthesized according to general procedure B. Yield: 221 mg, 95%; White solid,  $^1\text{H}$  NMR (500 MHz, DMSO):  $\delta$  7.97-7.93 (m, 2H), 7.88-7.85 (m, 1H), 7.66-7.61 (m, 1H), 7.52-7.48 (m, 1H), 7.43-7.39 (m, 1H), 7.35-7.25 (m, 2H), 7.17-7.11 (m, 1H), 4.41 (s, 2H);  $^{13}\text{C}$  NMR (125 MHz, DMSO): 150.33, 147.95, 131.57, 129.81, 129.68, 128.35, 128.33, 127.87, 126.90, 124.34, 123.42, 122.49, 119.49, 117.51, 116.06, 111.68, 23.87; HRMS-(EI) ( $m/z$ ):  $M^+$  calcd for  $\text{C}_{17}\text{H}_{12}\text{O}_1$ , 232.088813; found 232.088790.

9-methy-7*H*-benzo[*c*]xanthene **3j**

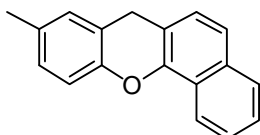

Synthesized according to general procedure A. Yield: 207 mg, 84%; Synthesized according to general procedure B. (at 200 °C) Yield: 190 mg, 77%; White solid,  $^1\text{H}$  NMR (500 MHz, DMSO)  $\delta$  8.30-8.26 (m, 1H), 7.92-7.88 (m, 1H), 7.62-7.51 (m, 3H), 7.36-7.30 (m, 1H), 7.17-7.12 (m, 1H), 7.10-7.04 (m, 2H), 4.13 (s, 2H), 2.27 (s, 3H);  $^{13}\text{C}$  NMR (125 MHz, DMSO): 149.00, 145.64, 132.90, 132.43, 129.43, 128.29, 127.67, 127.00, 126.11, 123.40, 122.29, 120.73, 119.91, 116.07, 114.47, 27.13, 20.27; HRMS-(EI) ( $m/z$ ):  $M^+$  calcd for  $\text{C}_{18}\text{H}_{14}\text{O}_1$ , 246.104468; found 246.104376.

14*H*-dibenzo[*a,h*]xanthene **3k**

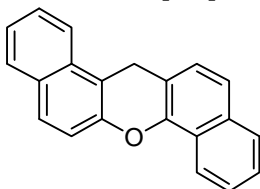

Synthesized according to general procedure A. Yield: 234 mg, 83%; Synthesized according to general procedure B. Yield: 271 mg, 96%; White solid,  $^1\text{H}$  NMR (500 MHz,  $\text{CDCl}_3$ ):  $\delta$  8.46-8.42 (m, 1H), 7.94-7.78 (m, 4H), 7.64-7.56 (m, 3H), 7.54-7.43 (m, 3H), 7.40-7.37 (m, 1H), 4.51 (s, 2H);  $^{13}\text{C}$  NMR (125 MHz,  $\text{CDCl}_3$ ): 148.70, 145.73, 133.53, 132.23, 130.44, 128.57, 128.41, 127.69, 127.14, 126.85, 126.19, 126.08, 124.35, 124.28, 122.75, 122.53, 121.53, 118.14, 113.61, 111.79, 25.46; HRMS-(EI) ( $m/z$ ):  $M^+$  calcd for  $\text{C}_{21}\text{H}_{14}\text{O}_1$ , 282.104462; found 282.104546.

### 2-methoxy-7*H*-benzo[*c*]xanthene **31**

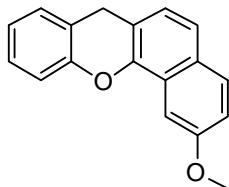

Synthesized according to general procedure A. Yield: 210 mg, 80%; Synthesized according to general procedure B. Yield: 252 mg, 96%; White solid,  $^1\text{H}$  NMR (500 MHz, DMSO):  $\delta$  7.84-7.80 (m, 1H), 7.62-7.52 (m, 2H), 7.32-7.26 (m, 3H), 7.21-7.15 (m, 2H), 7.13-7.08 (m, 1H), 4.16 (s, 2H), 3.94 (s, 3H);  $^{13}\text{C}$  NMR (125 MHz, DMSO): 157.64, 151.18, 144.83, 129.41, 129.22, 128.32, 127.75, 124.47, 124.30, 123.47, 122.32, 120.43, 118.34, 116.41, 115.21, 99.45, 55.23, 27.24; HRMS-(EI) ( $m/z$ ):  $M^+$  calcd for  $\text{C}_{18}\text{H}_{14}\text{O}_2$ , 262.099378; found 262.099142.

### 13,14-dihydrochromeno[3,2*a*]xanthene **5**

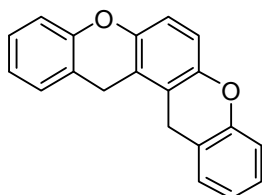

Synthesized according to general procedure A. Yield: 20 mg, 7%; Synthesized according to general procedure B. Yield: 14 mg, 5%; White solid,  $^1\text{H}$  NMR (500 MHz,  $\text{CDCl}_3$ ):  $\delta$  7.22-7.15 (m, 4H), 7.05-6.98 (m, 4H), 6.88 (s, 2H), 3.96 (s, 4H);  $^{13}\text{C}$  NMR (125 MHz,  $\text{CDCl}_3$ ): 151.61, 147.12, 129.21, 127.98, 122.92, 118.84, 118.69, 116.40, 115.50, 25.6; HRMS-(EI) ( $m/z$ ):  $M^+$  calcd for  $\text{C}_{20}\text{H}_{14}\text{O}_2$ , 286.099377, found 286.099179.

The structure was assigned based on an INEPT-INADEQUATE spectrum which was recorded as described in Weigelt and Otting<sup>1</sup> on a Bruker AV600 spectrometer equipped with a 5-mm H/C/N triple-resonance cryogenically-cooled probehead, with 16 scans per increment, TD(F2) = 1k, TD(F1) = 2k, and 2 s of relaxation delay for acquisition. (Sample amount was 12mg of **5** in  $\text{CDCl}_3$ ).

<sup>1</sup> J. Weigelt and G. Otting, *J. Magn. Reson. A*, 1995, **113**, 128.

## NMR spectra of products

### 2-methoxy-9H-xanthene 3a

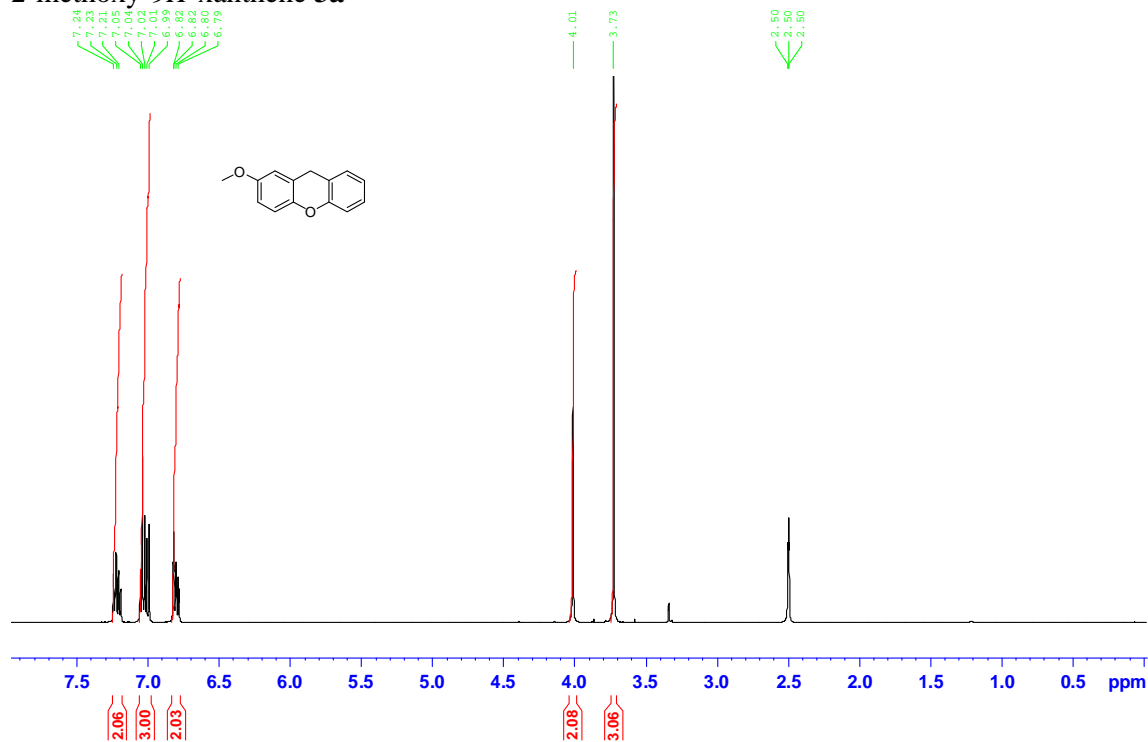

**Figure 1:**  $^1\text{H}$  NMR in DMSO

bsr-bc-087-01

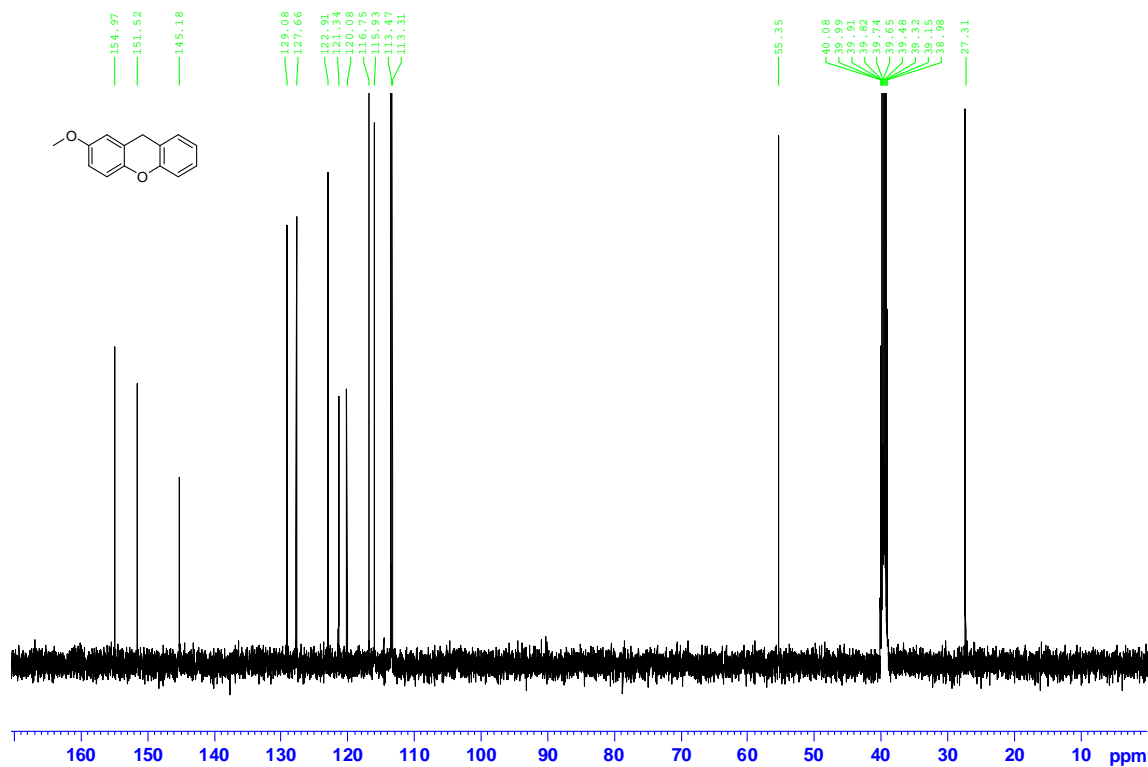

**Figure 2:**  $^{13}\text{C}$  NMR in DMSO

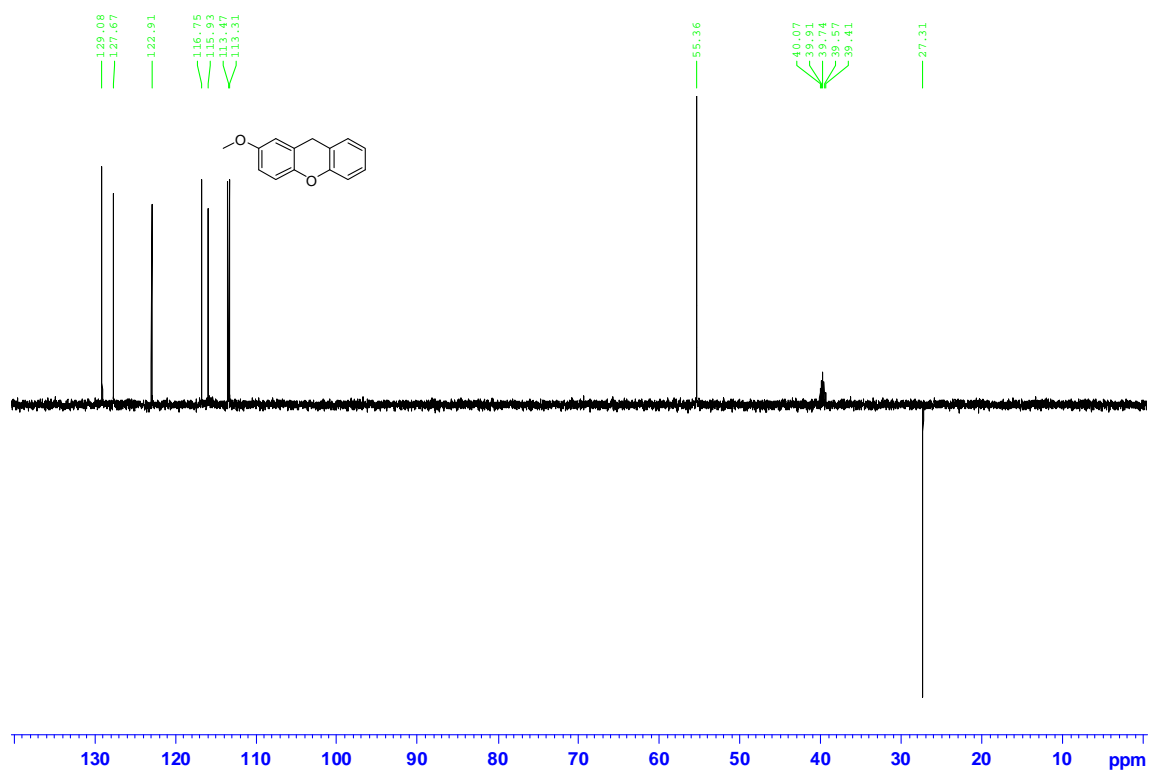

Figure 3: dept135 NMR in DMSO

9H-xanthene **3b**

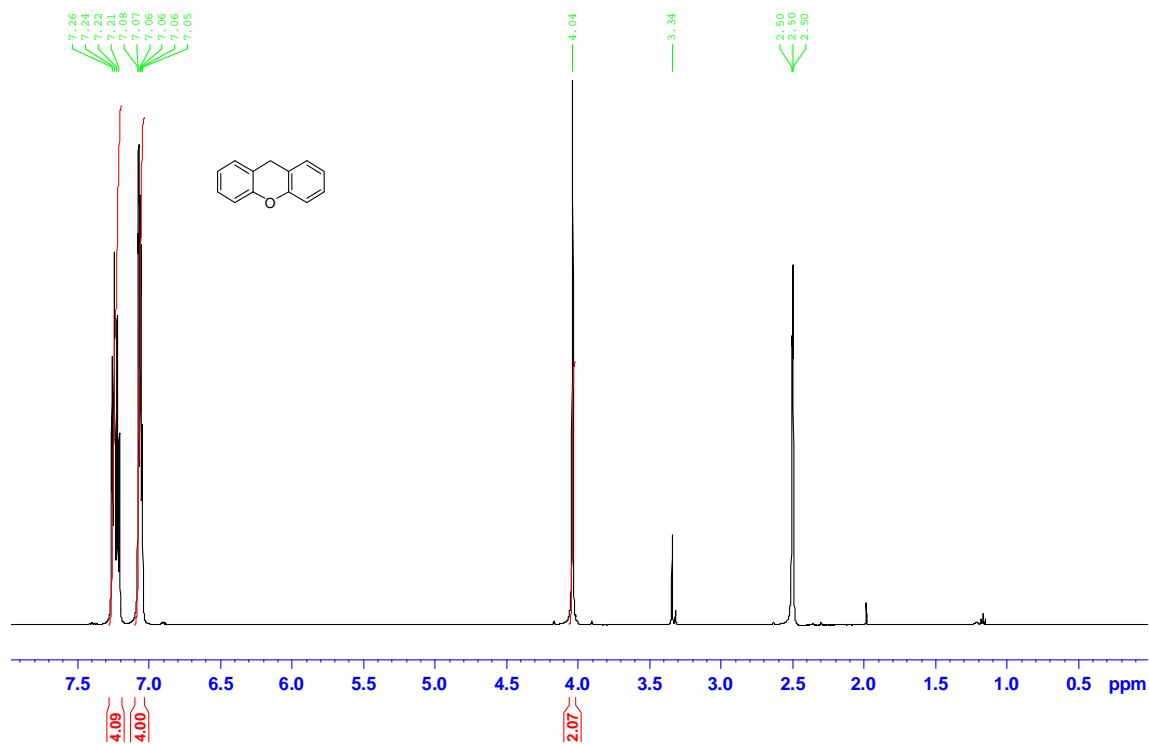

Figure 4: <sup>1</sup>H NMR in DMSO



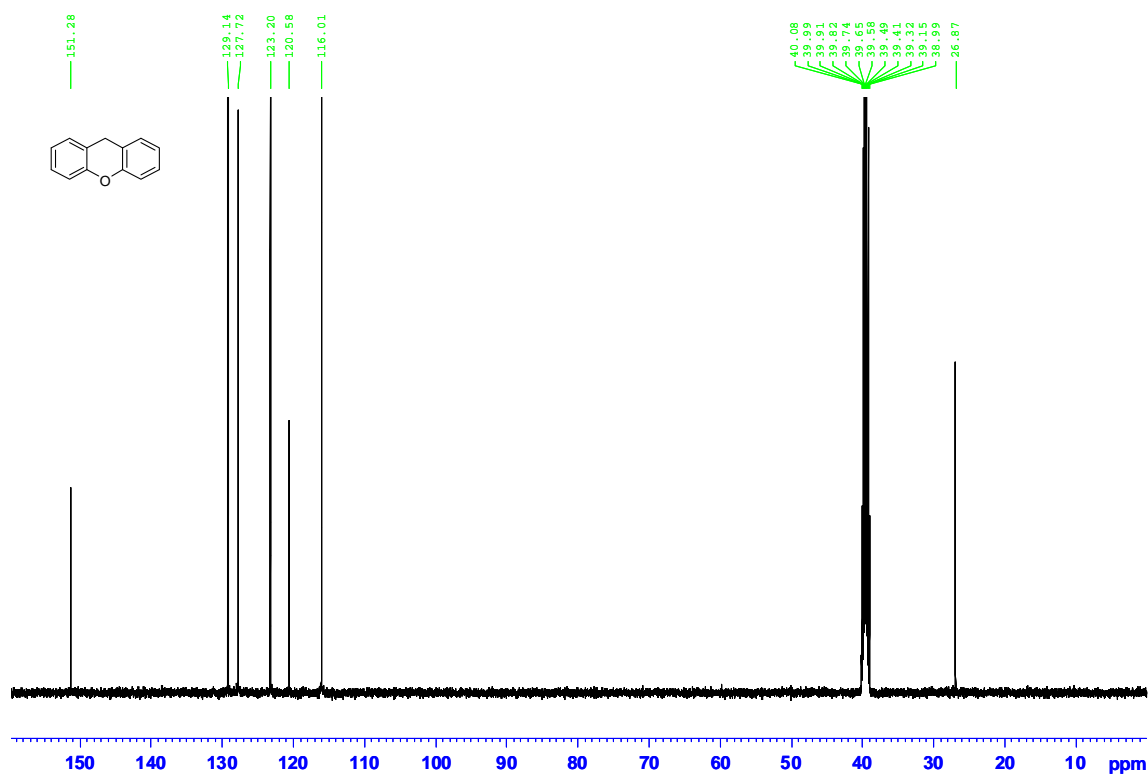

Figure 5:  $^{13}\text{C}$  NMR in DMSO

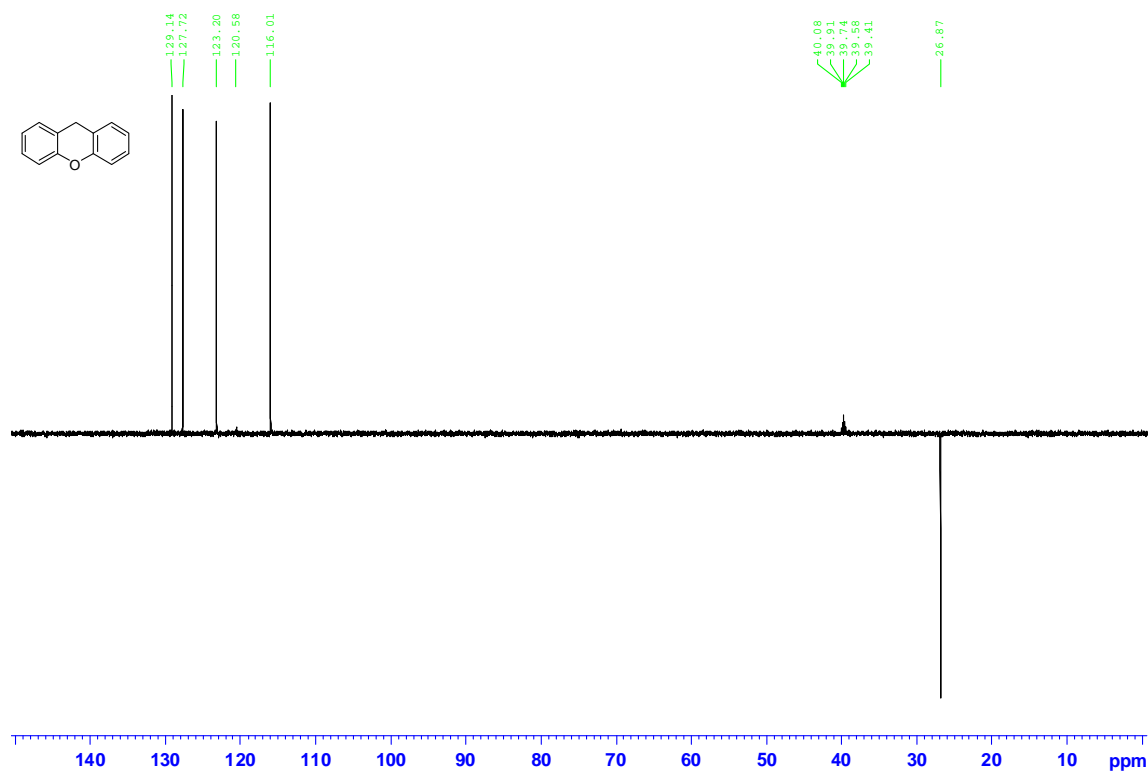

Figure 6: dept135 NMR in DMSO

4-methoxy-9H-xanthene **3c**

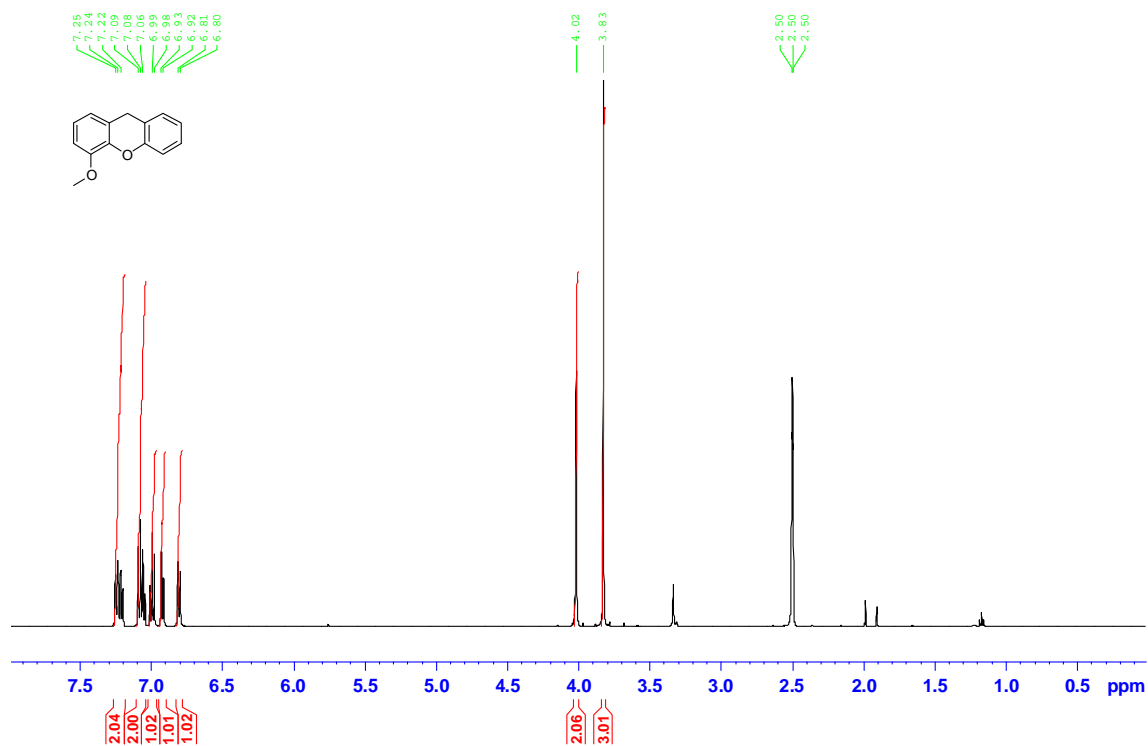

Figure 7: <sup>1</sup>H NMR in DMSO

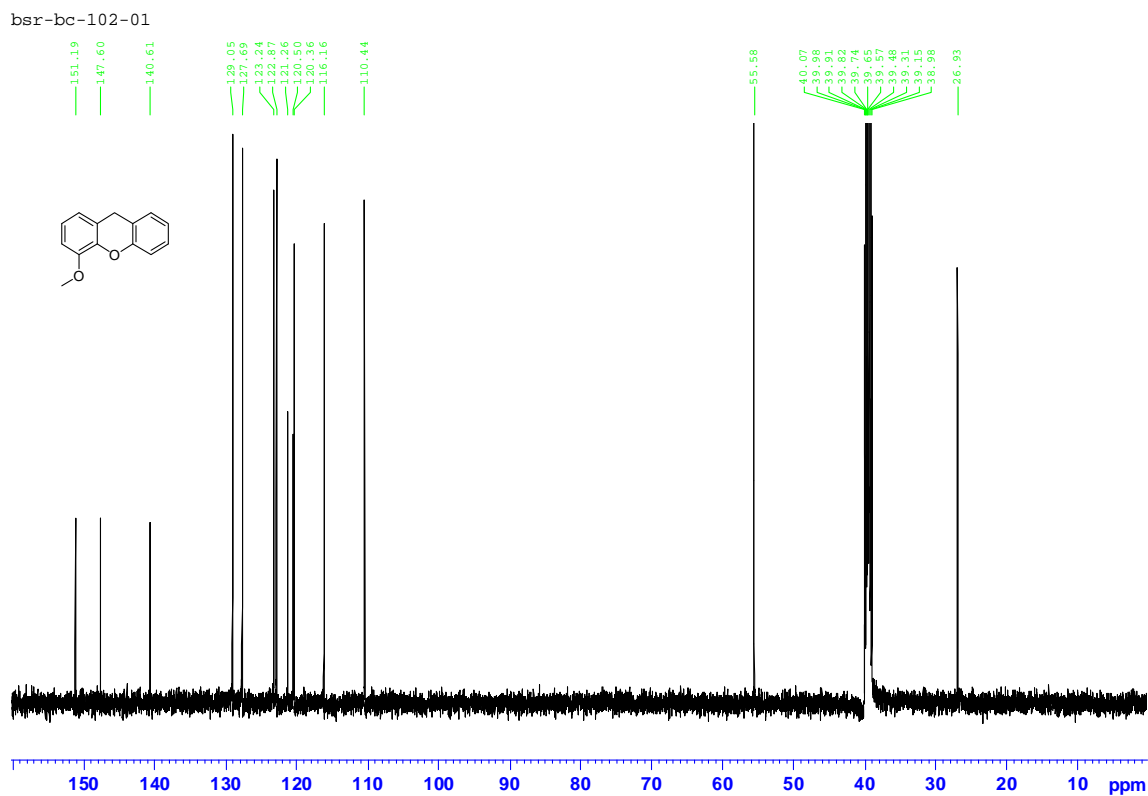

Figure 8: <sup>13</sup>C NMR in DMSO

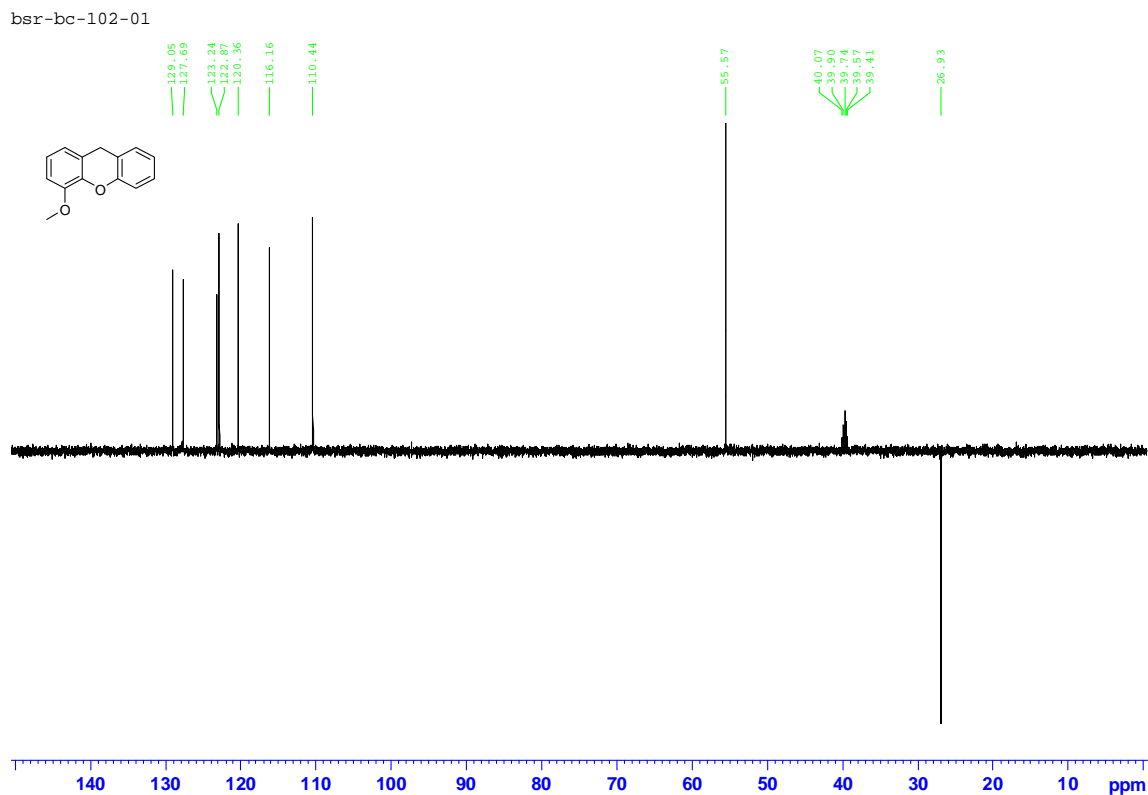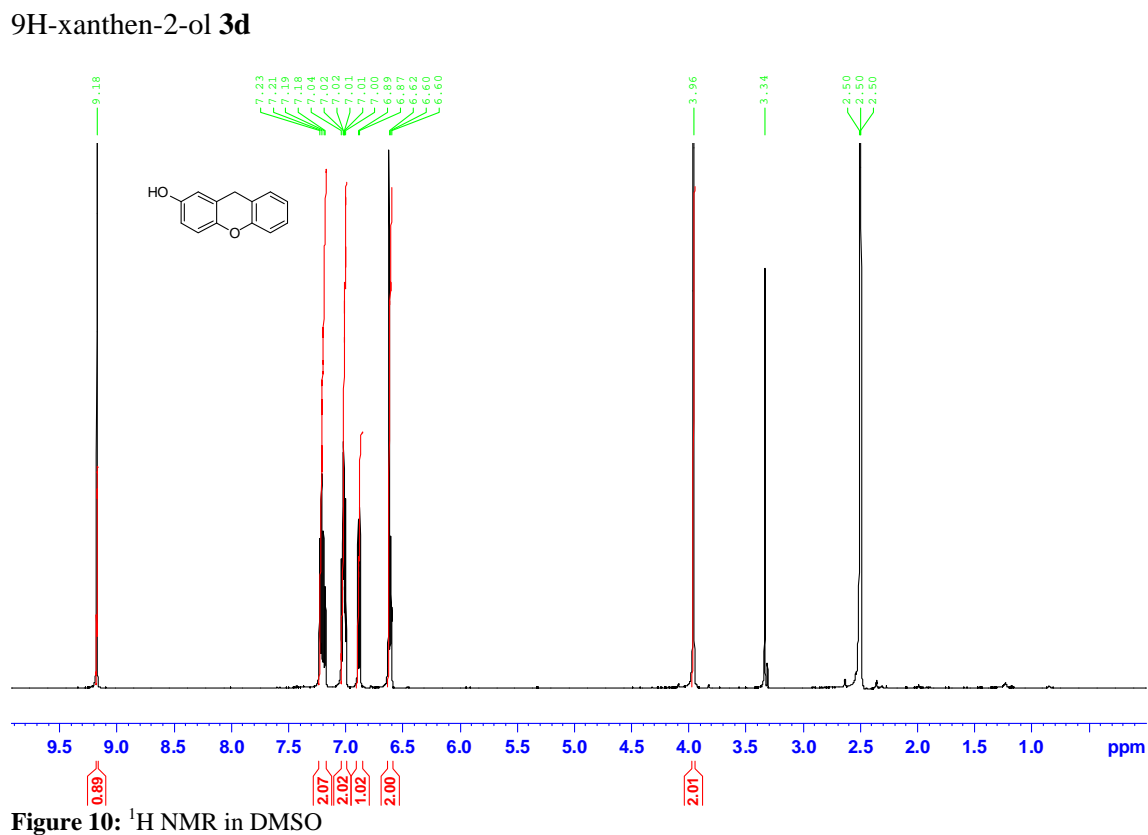

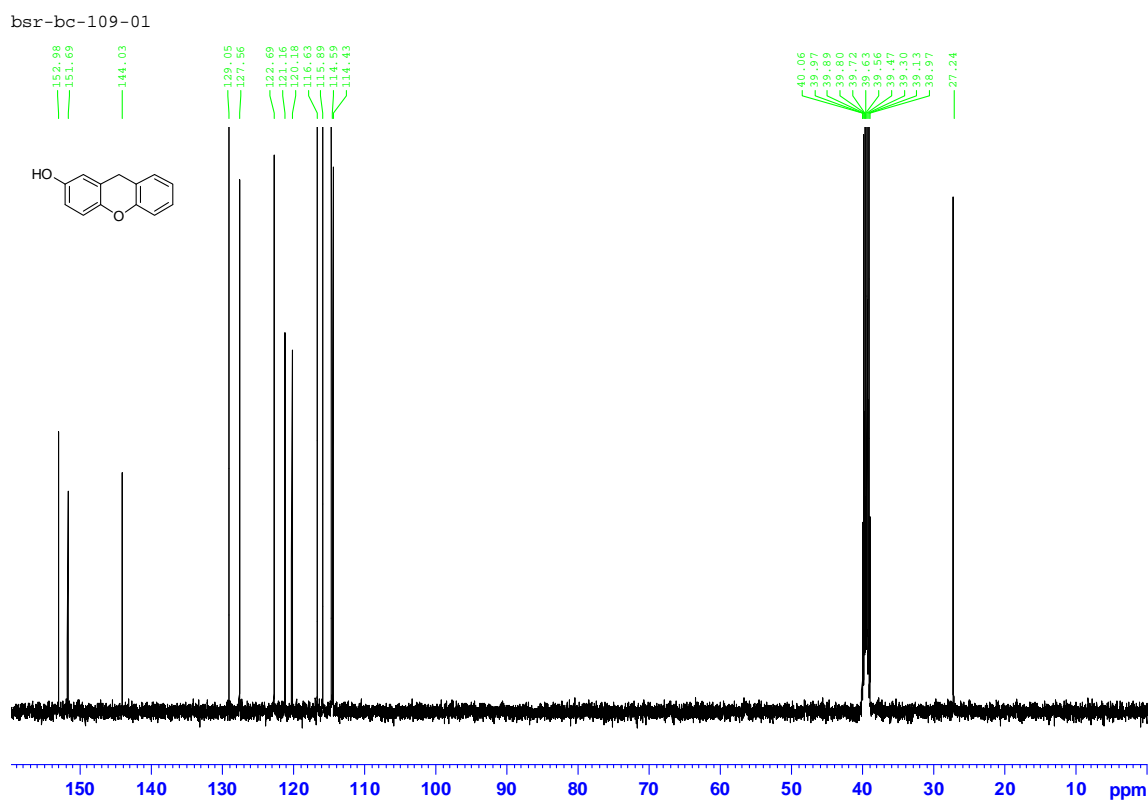

Figure 11:  $^{13}\text{C}$  NMR in DMSO

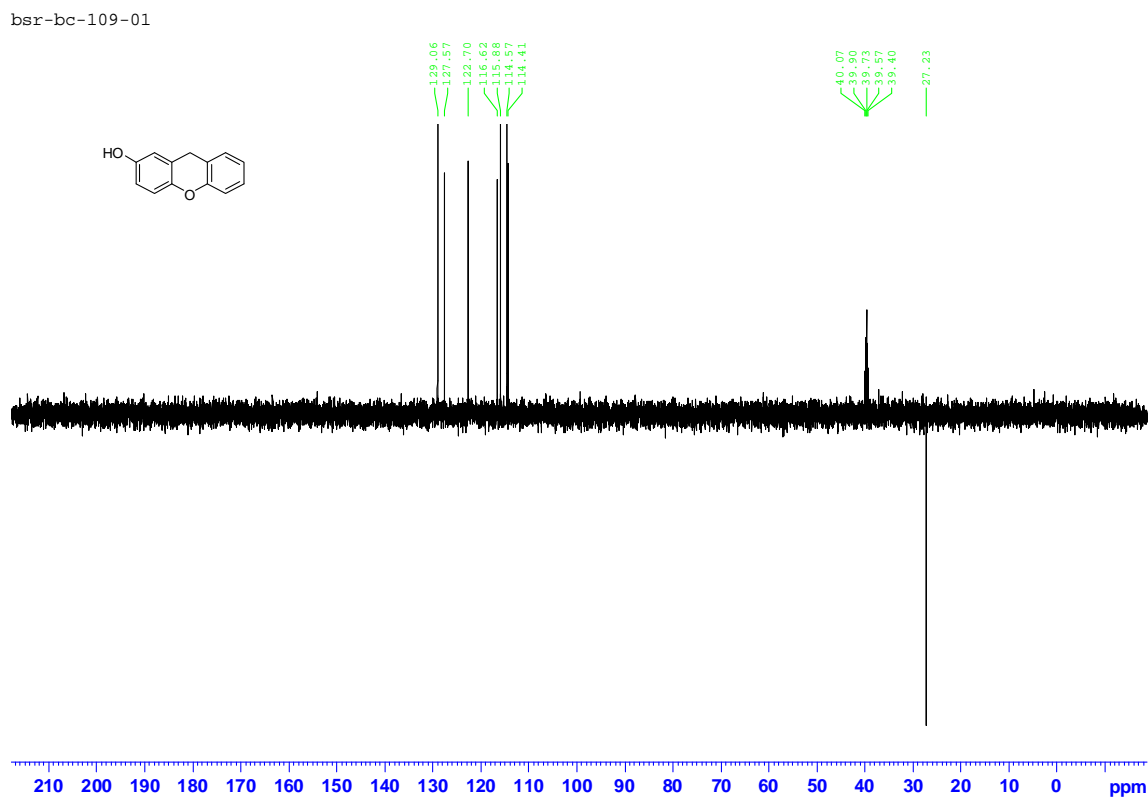

Figure 12: dept135 NMR in DMSO

2-methyl-9H-xanthene **3e**

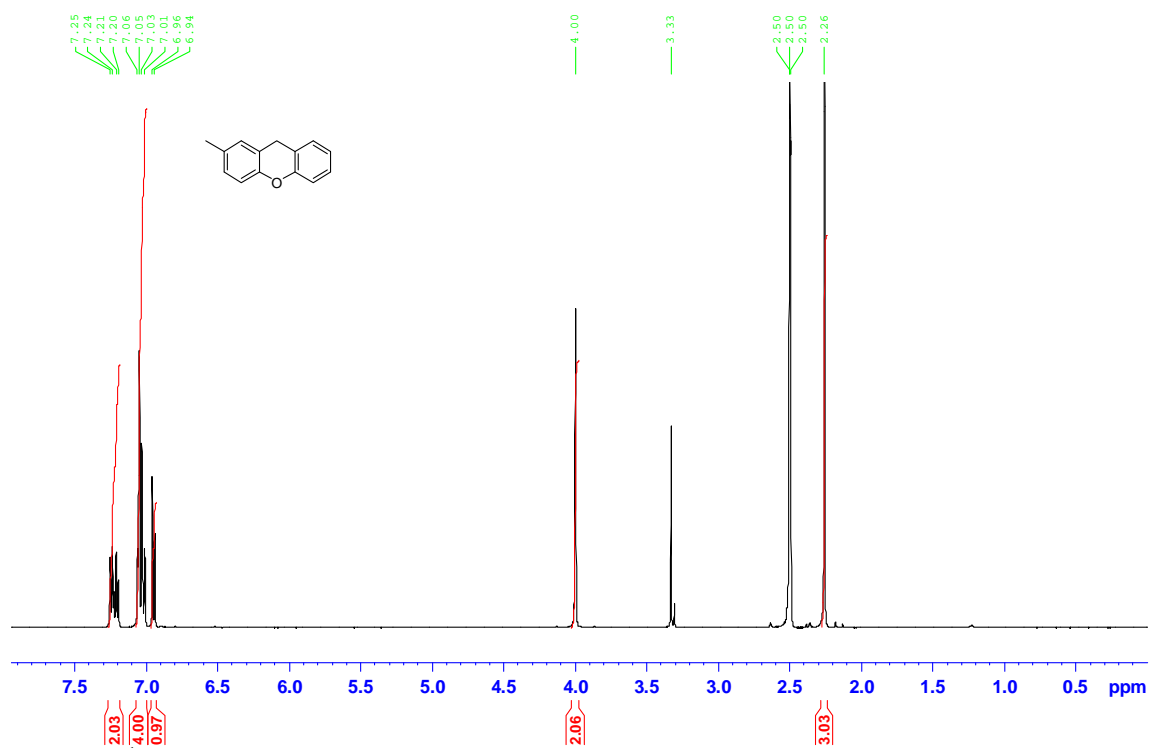

Figure 13: <sup>1</sup>H NMR in DMSO

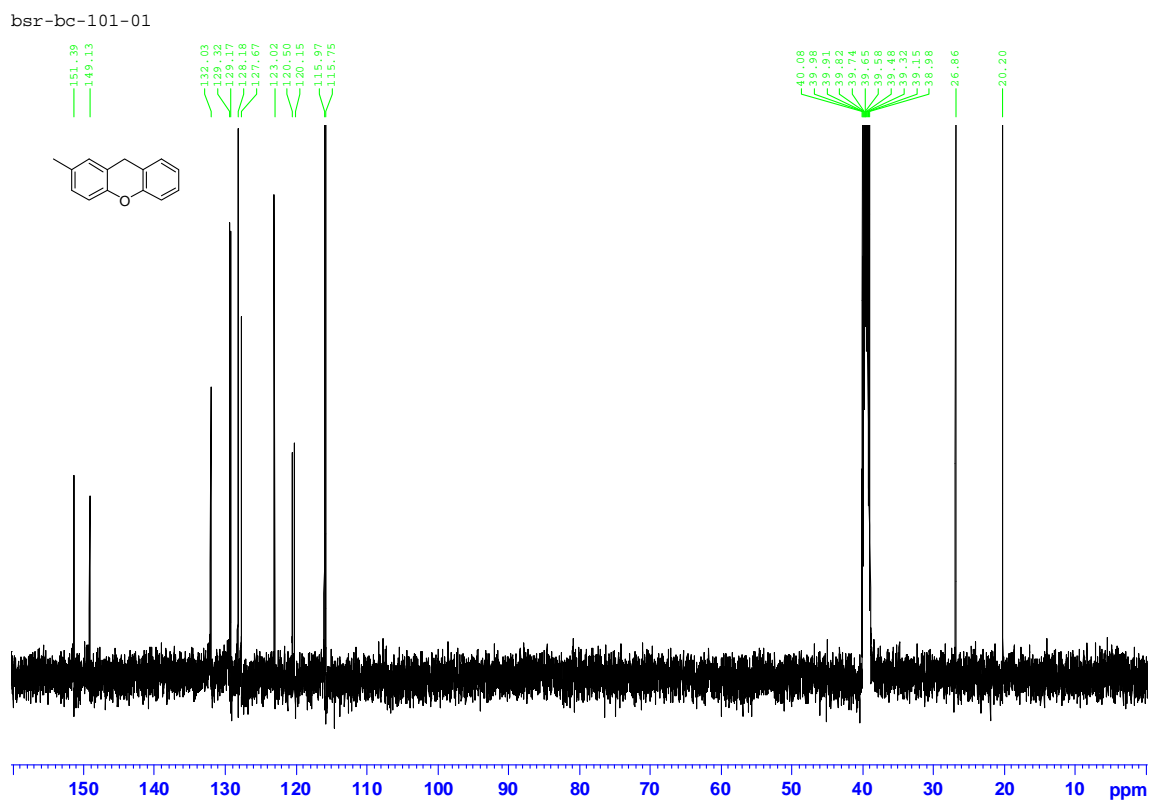

Figure 14: <sup>13</sup>C NMR in DMSO

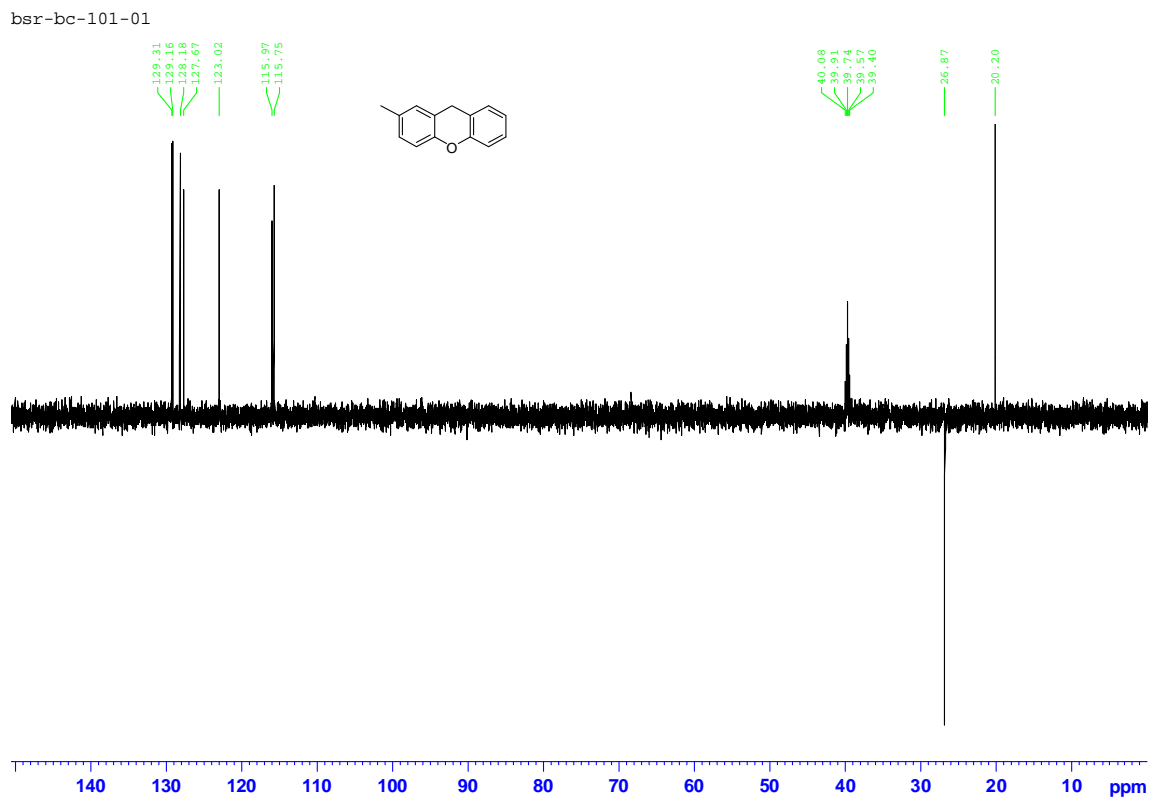

2-chloro-9H-xanthene **3f**

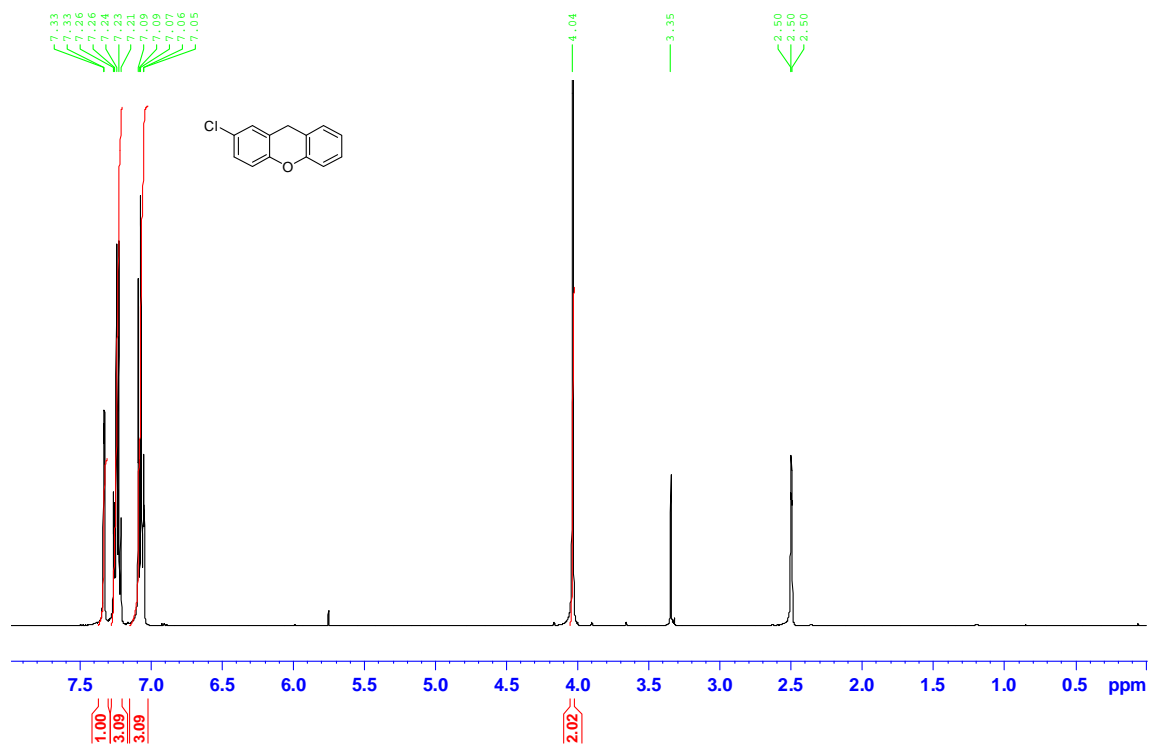

bsr-bc-099-01

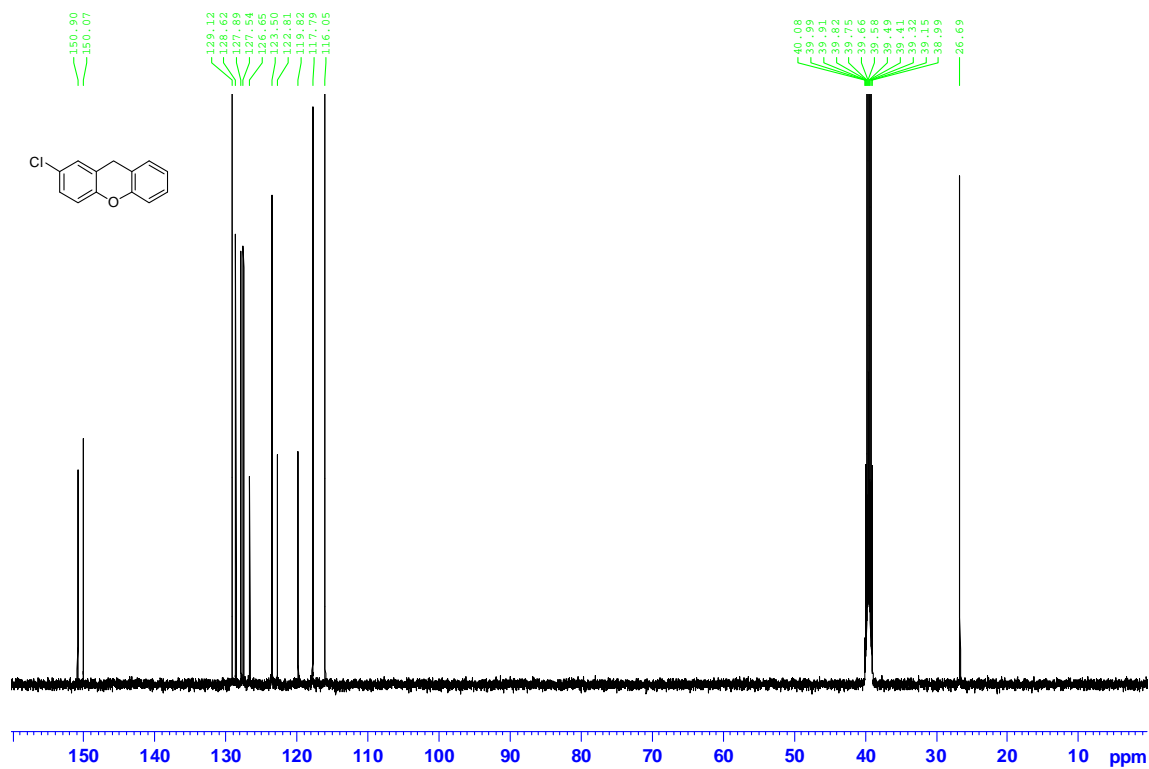

Figure 17:  $^{13}\text{C}$  NMR in DMSO

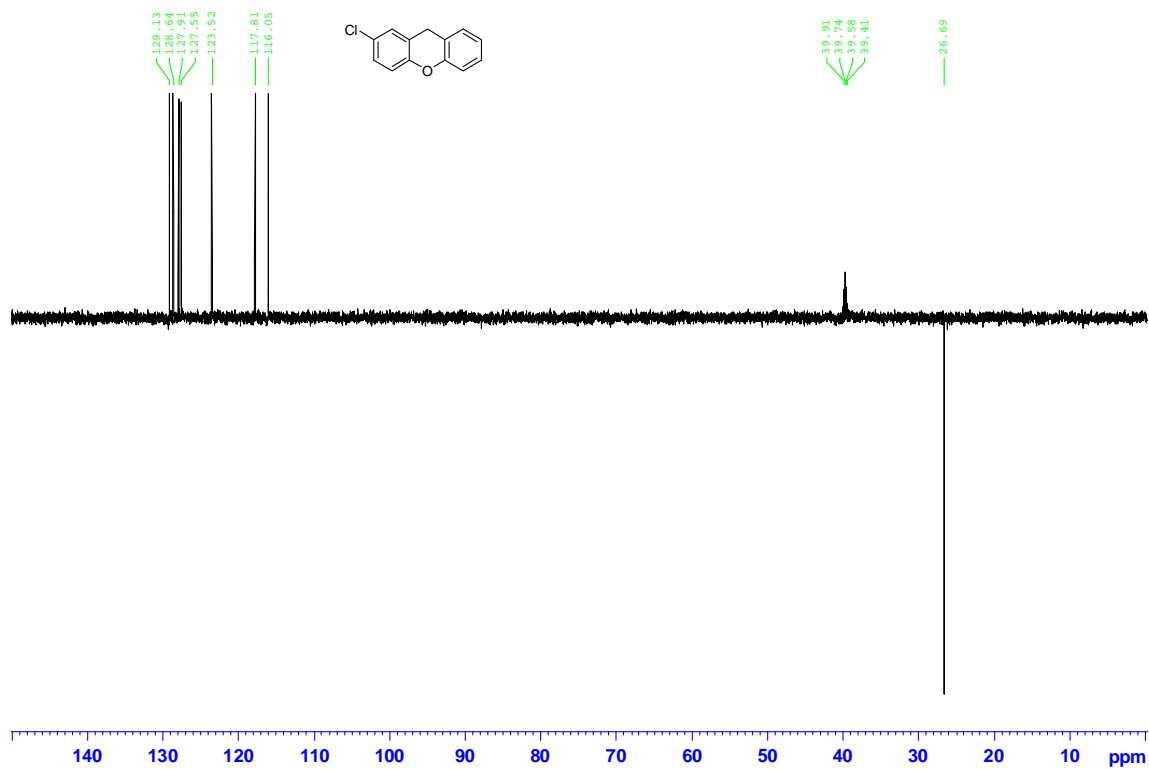

Figure 18: dept135 NMR in DMSO

1, 3-dimethyl-9H-xanthene **3g**

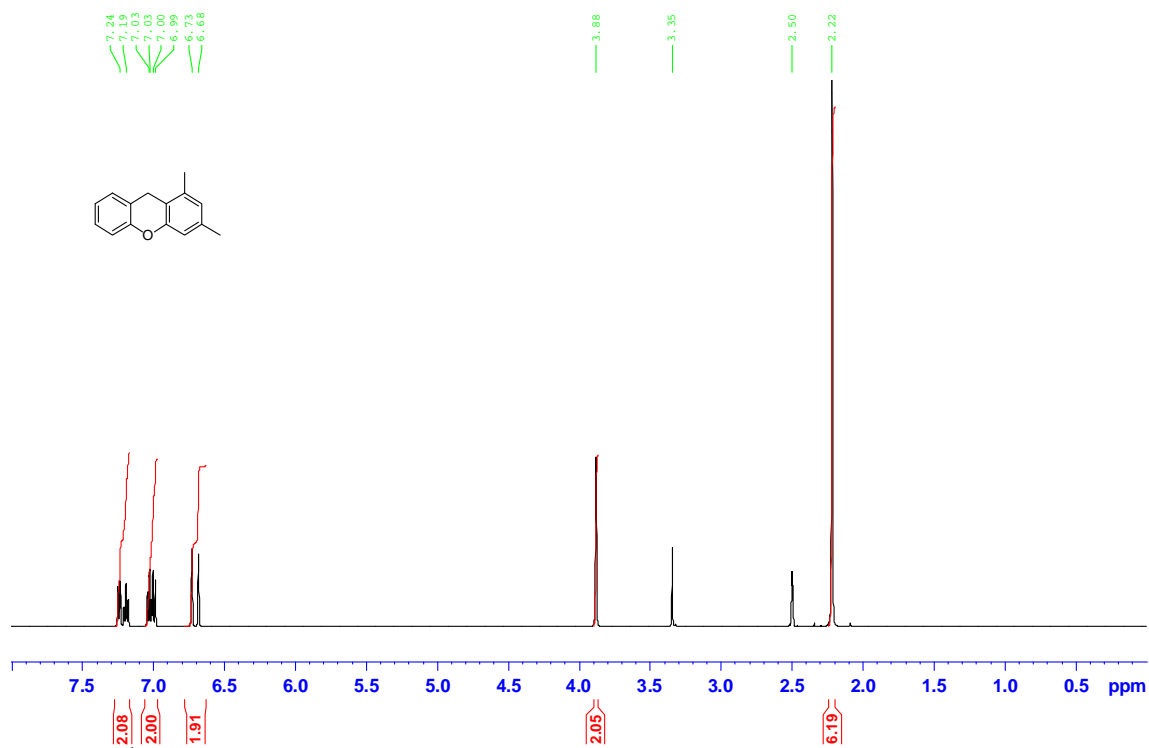

Figure 19:  $^1\text{H}$  NMR in DMSO

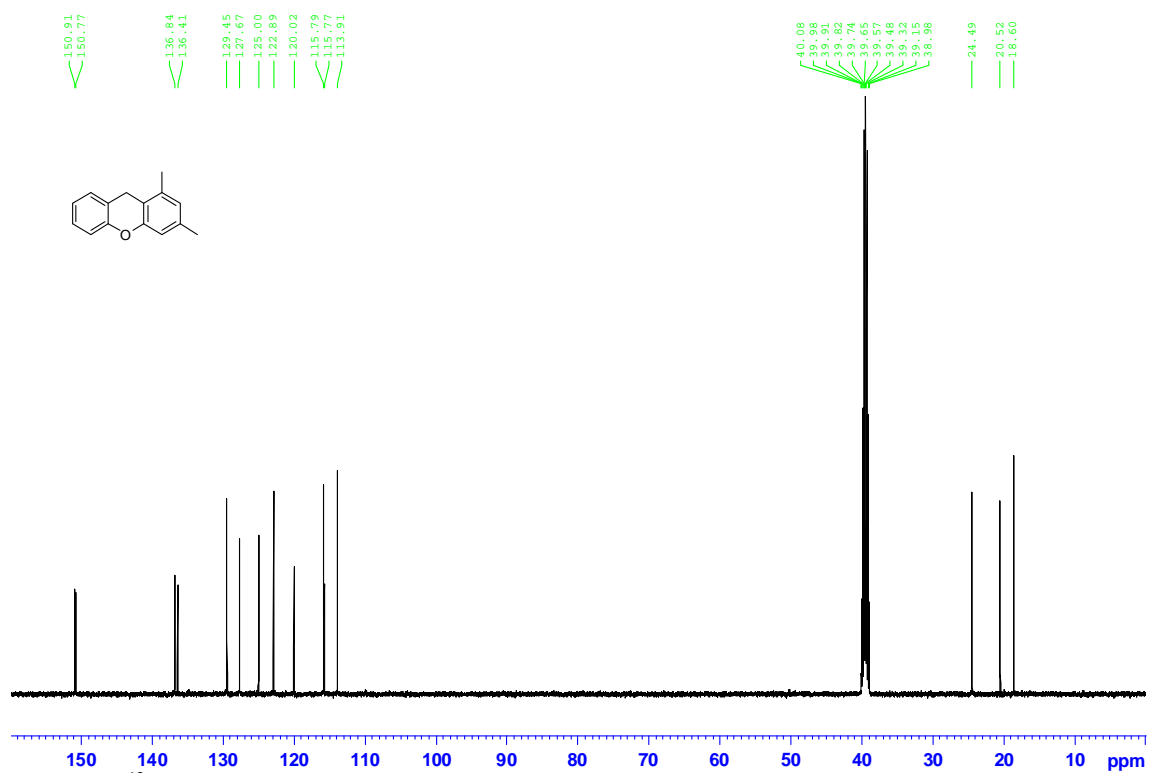

Figure 20:  $^{13}\text{C}$  NMR in DMSO



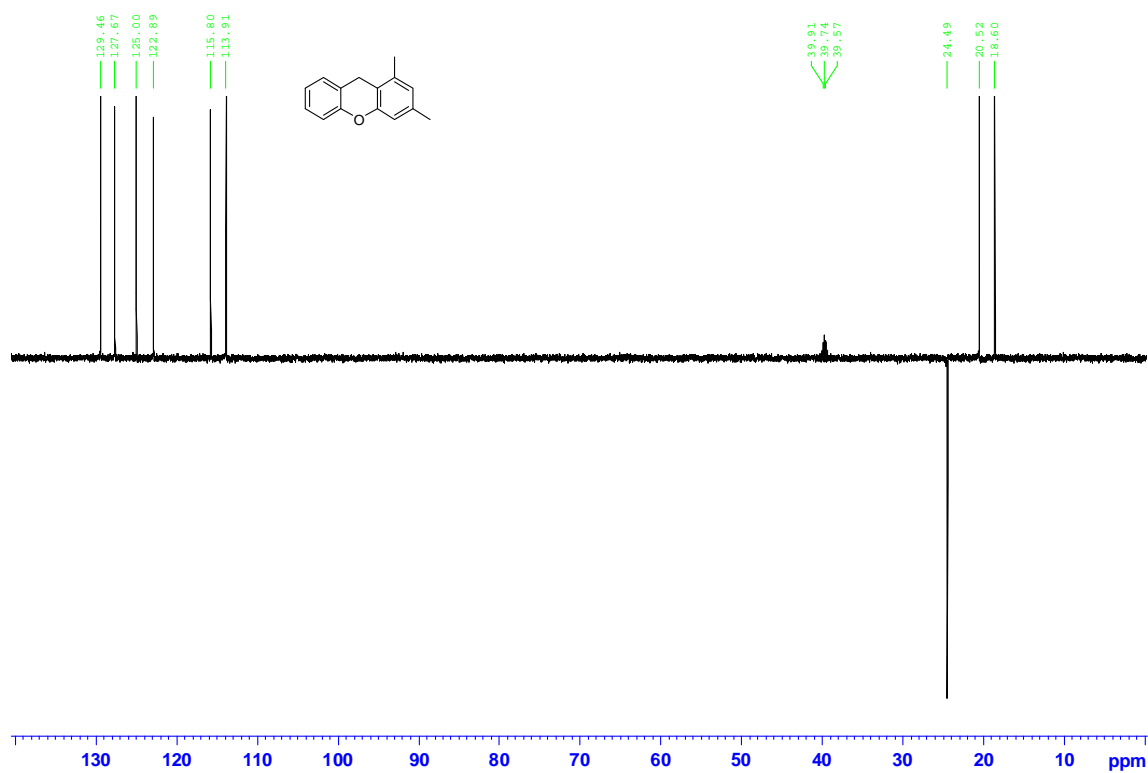

Figure 21: dept135 NMR in DMSO

7-methoxy-1, 3-dimethyl-9H-xanthene 3h

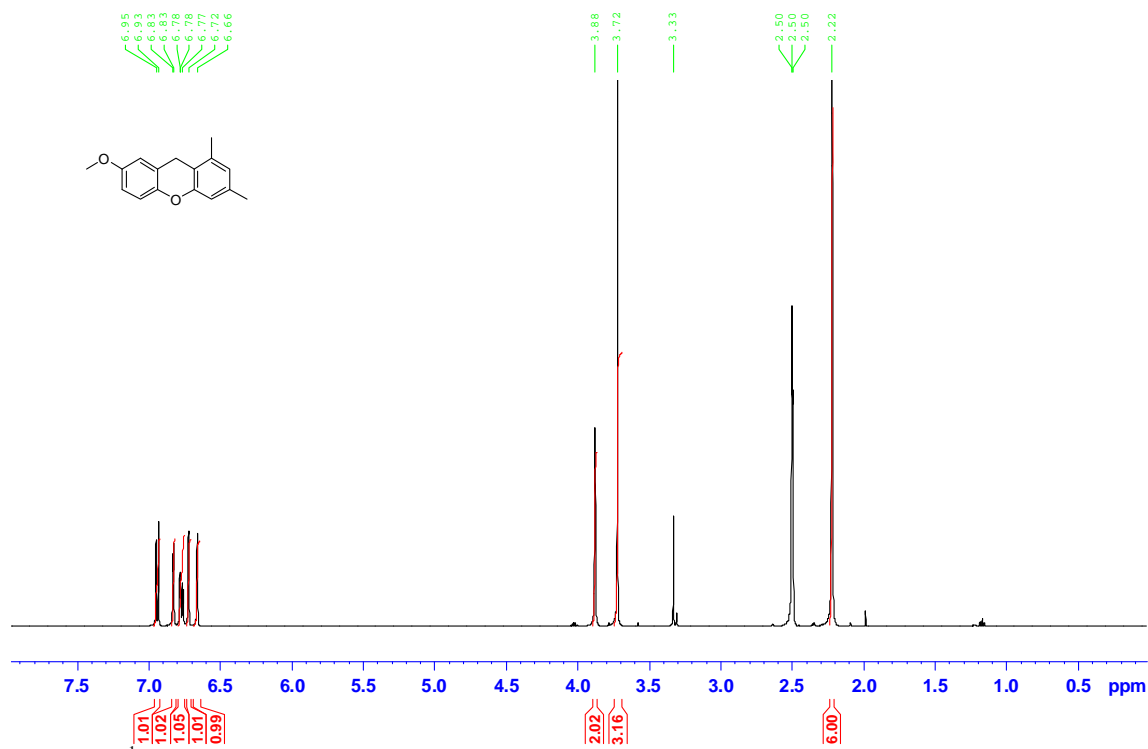

Figure 22: <sup>1</sup>H NMR in DMSO

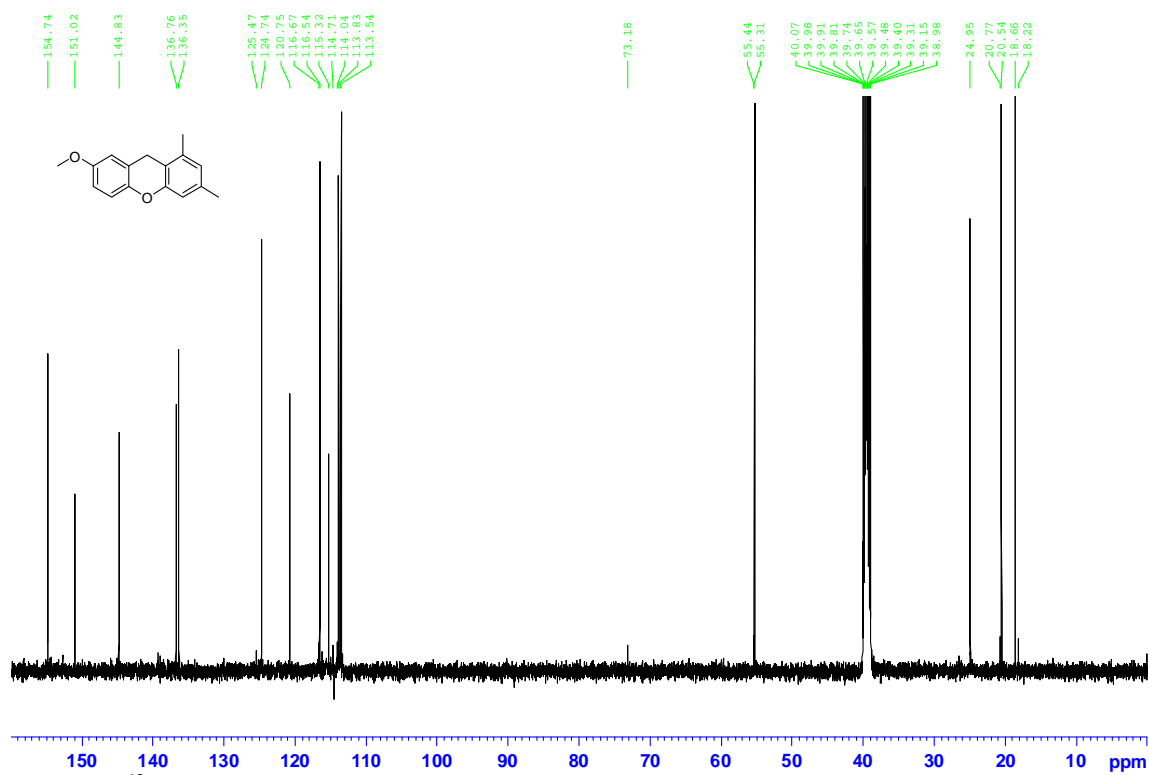

Figure 23:  $^{13}\text{C}$  NMR in DMSO

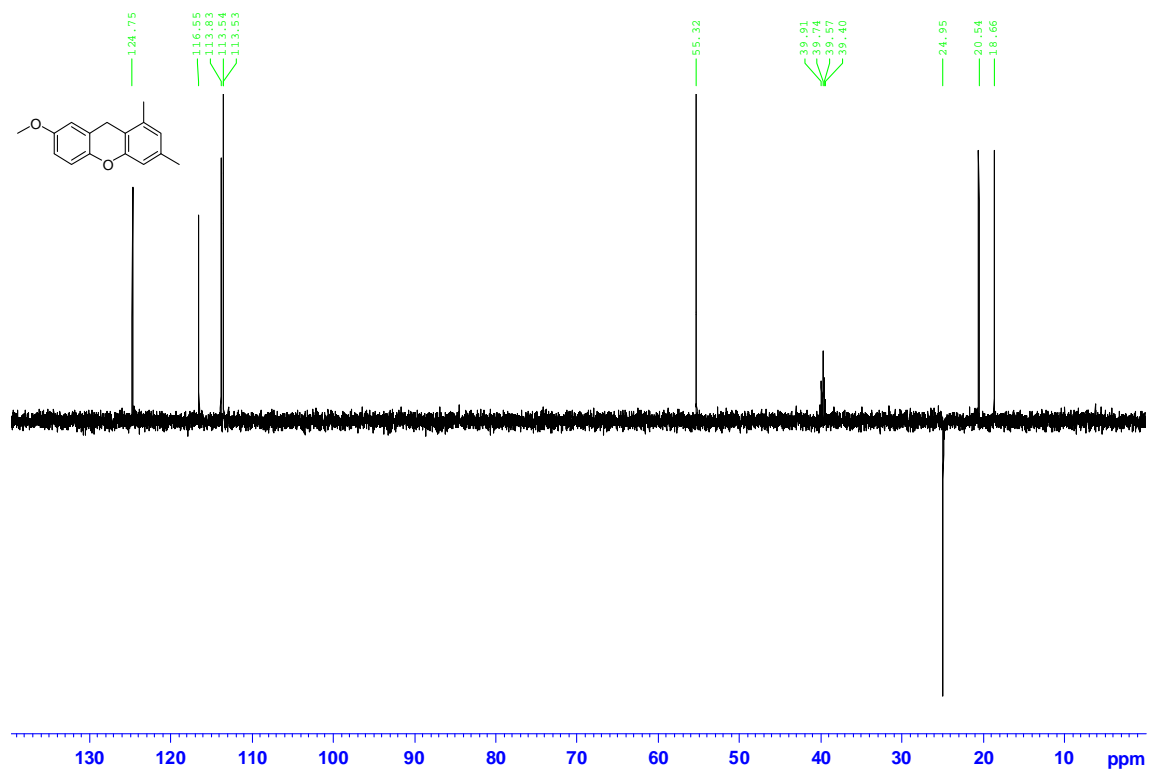

Figure 24: dept135 NMR in DMSO

12*H*-benzo[*a*]xanthene **3i**

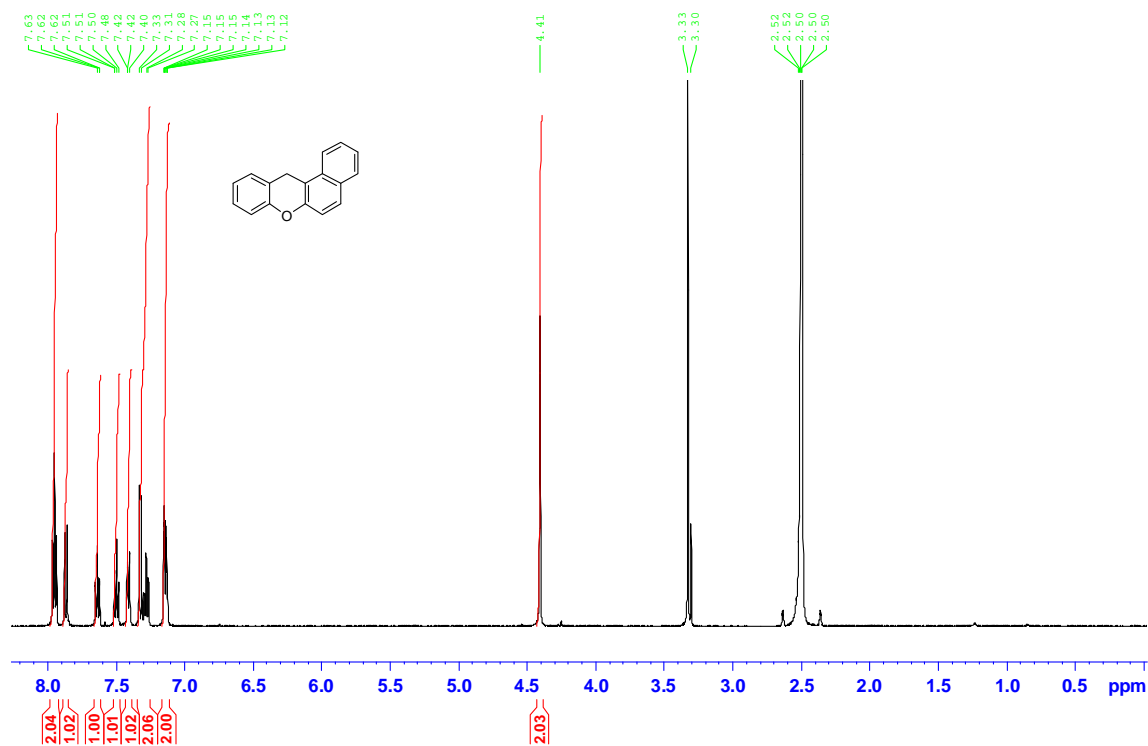

Figure 25: <sup>1</sup>H NMR in DMSO

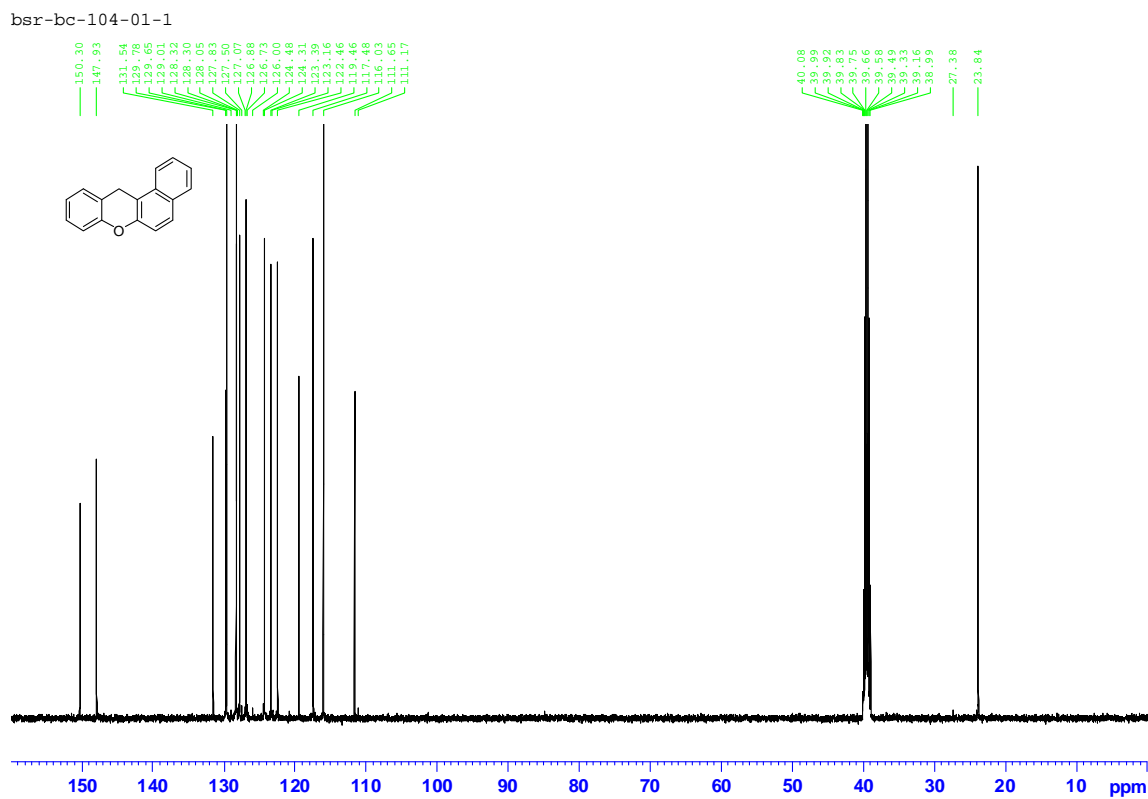

Figure 26: <sup>13</sup>C NMR in DMSO

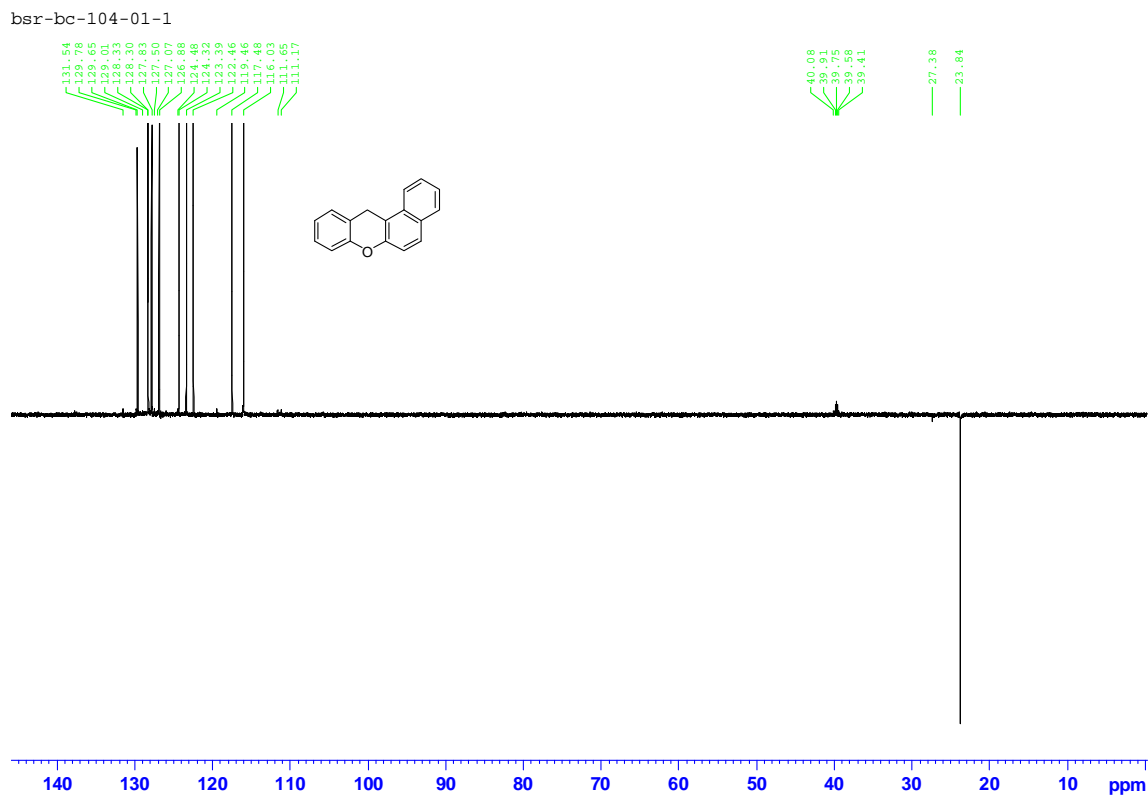

9-methy-7H-benzo[c]xanthene **3j**

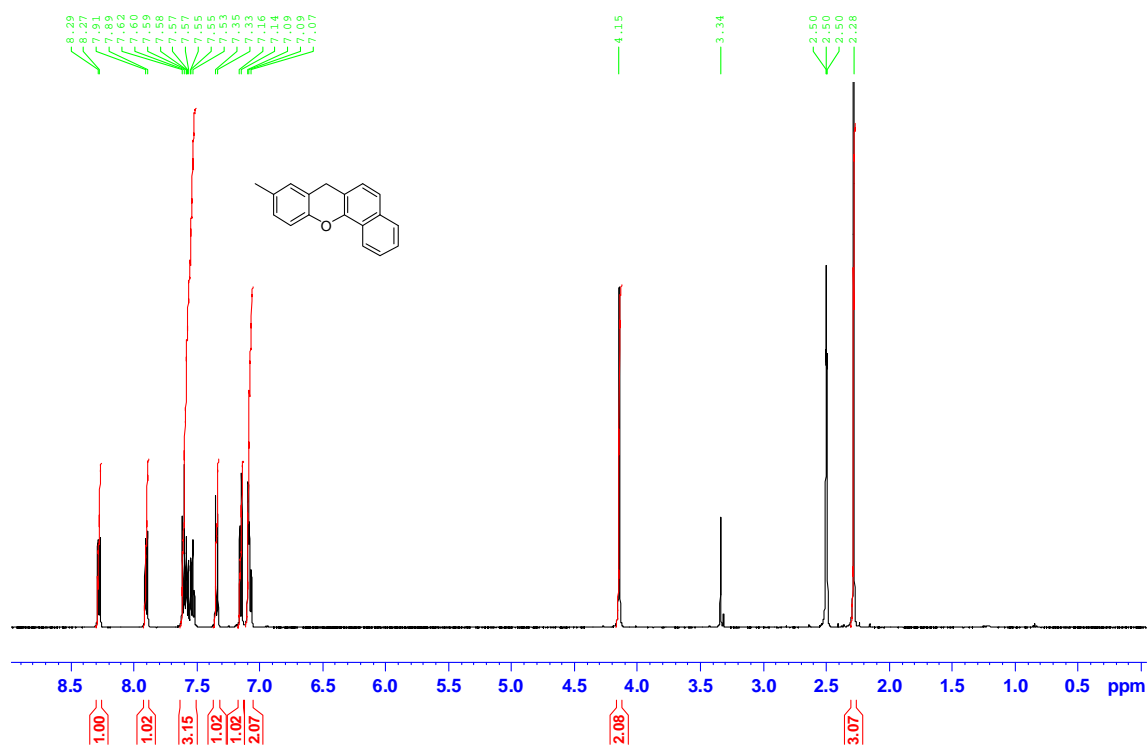

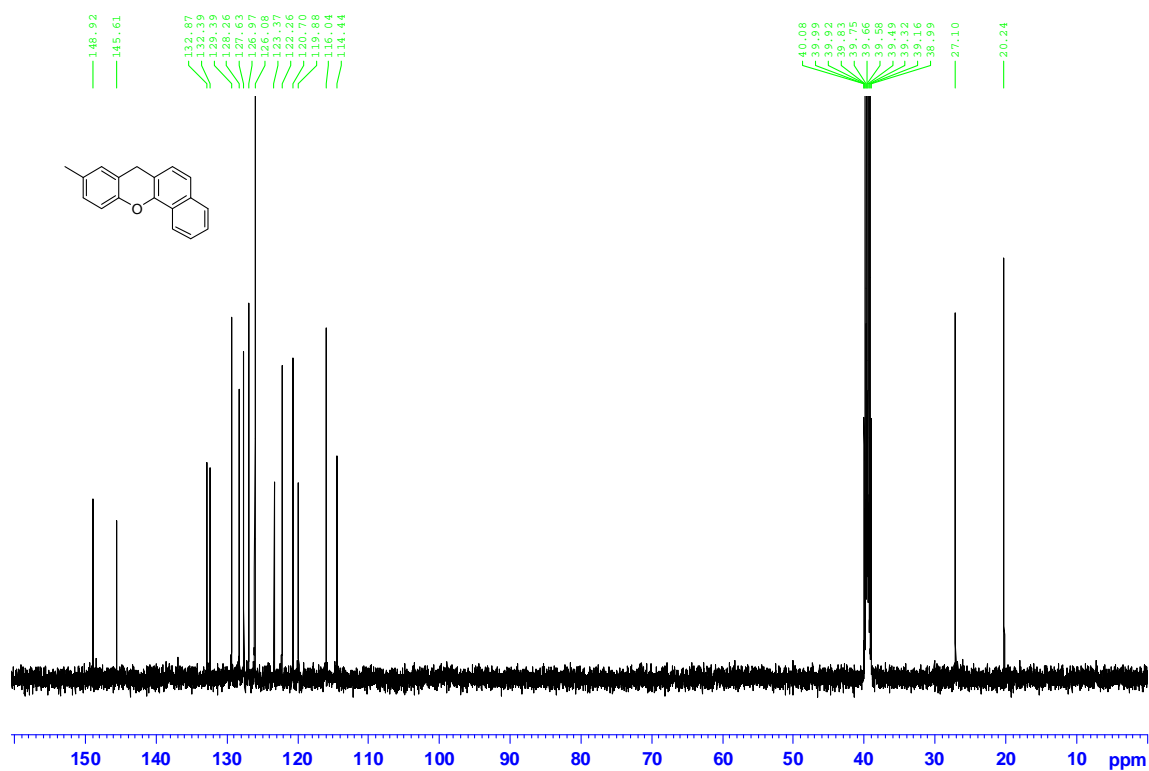

Figure 29:  $^{13}\text{C}$  NMR in DMSO

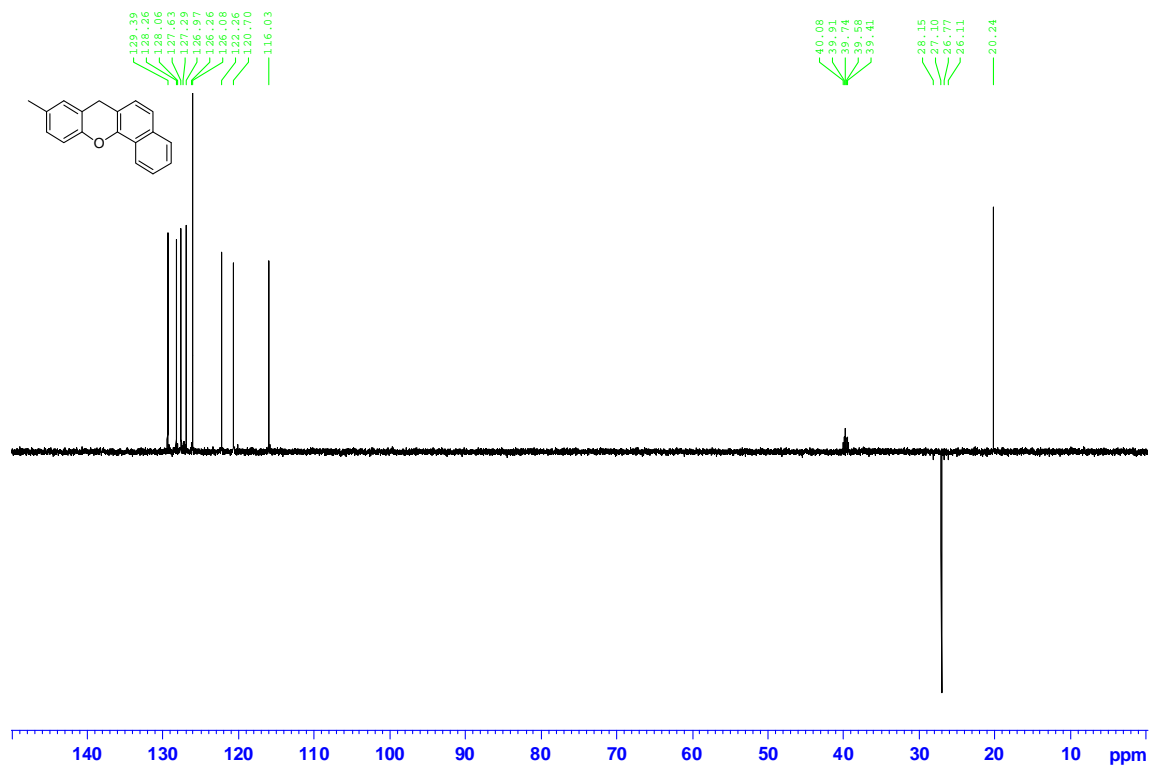

Figure 30: dept135 NMR in DMSO

14*H*-dibenzo[*a,h*]xanthene **3k**

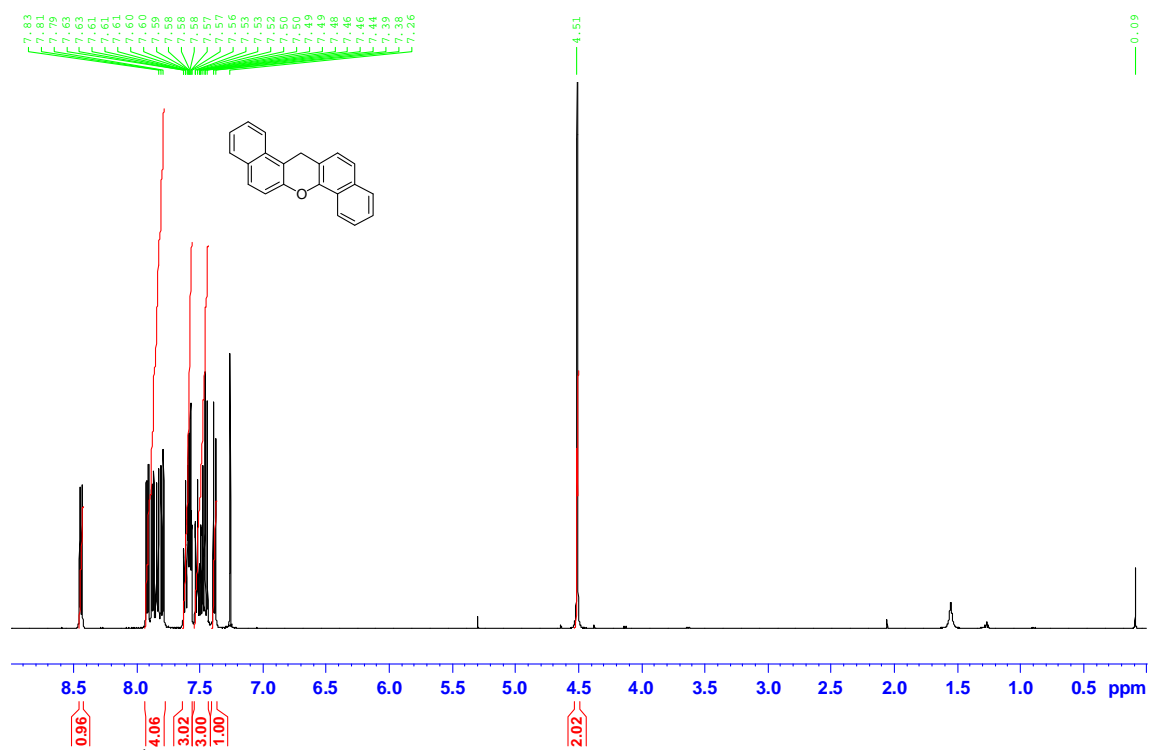

Figure 31:  $^1\text{H}$  NMR in  $\text{CDCl}_3$

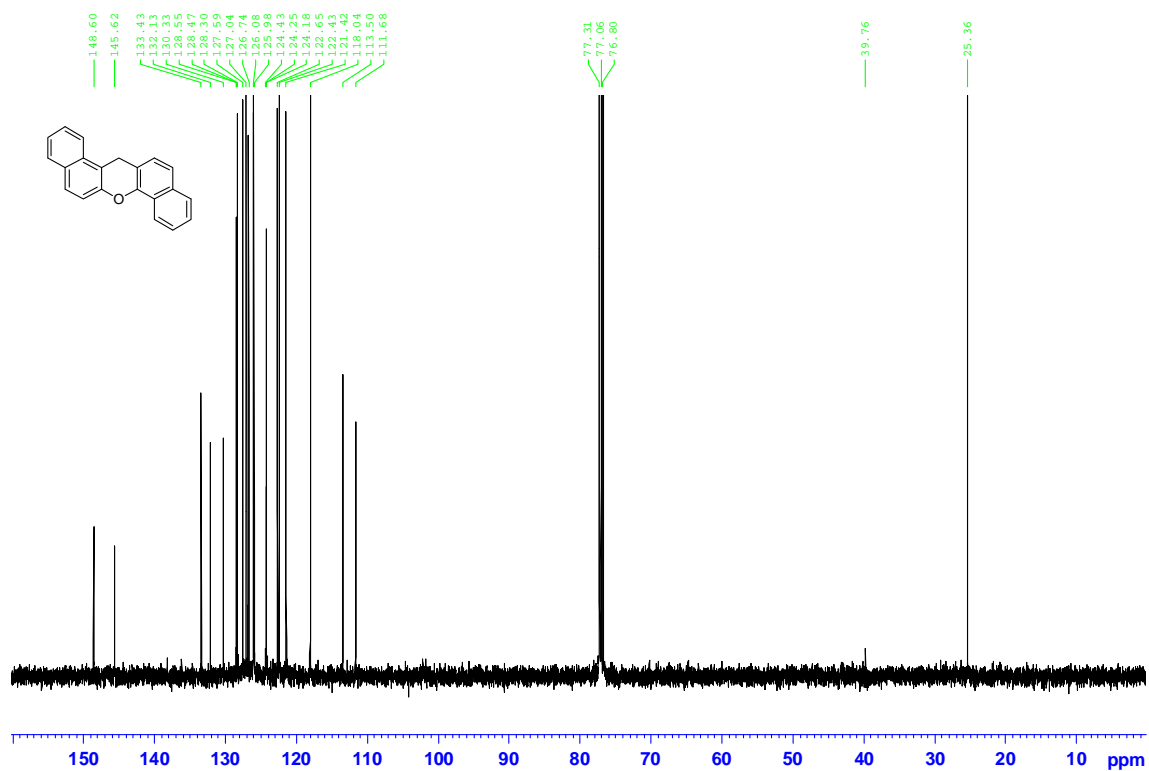

Figure 32:  $^{13}\text{C}$  NMR in  $\text{CDCl}_3$

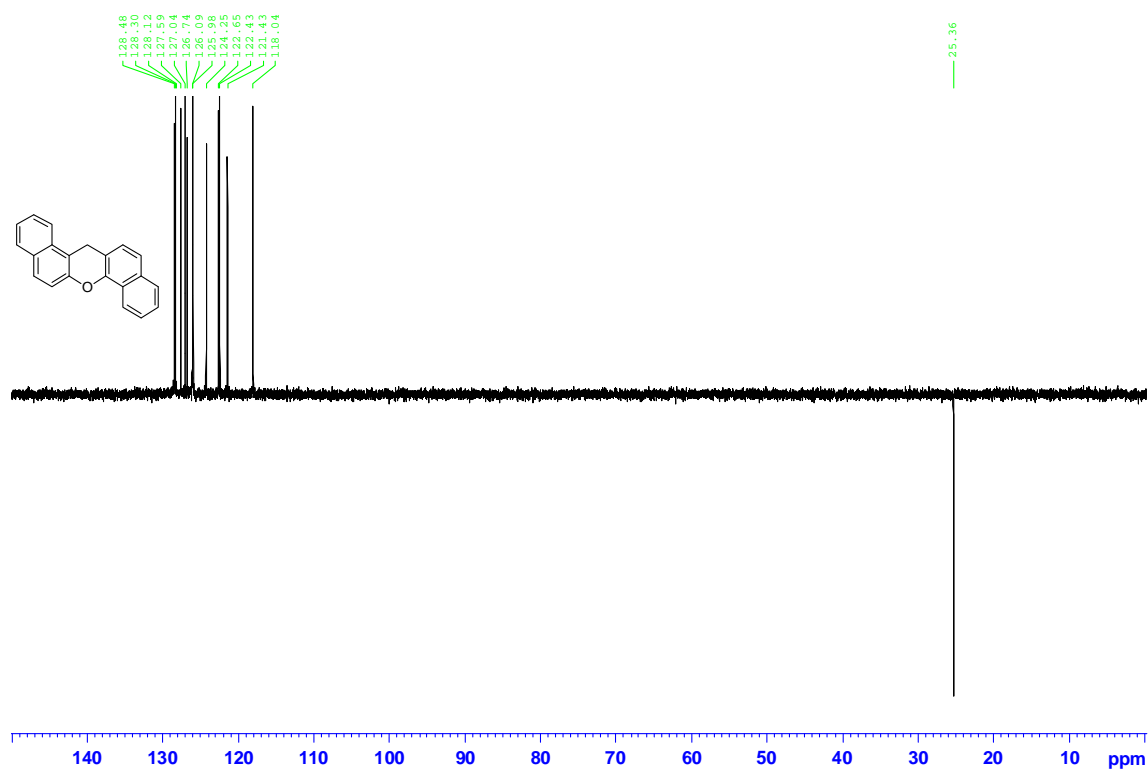

2-methoxy-7H-benzo[c]xanthene 31

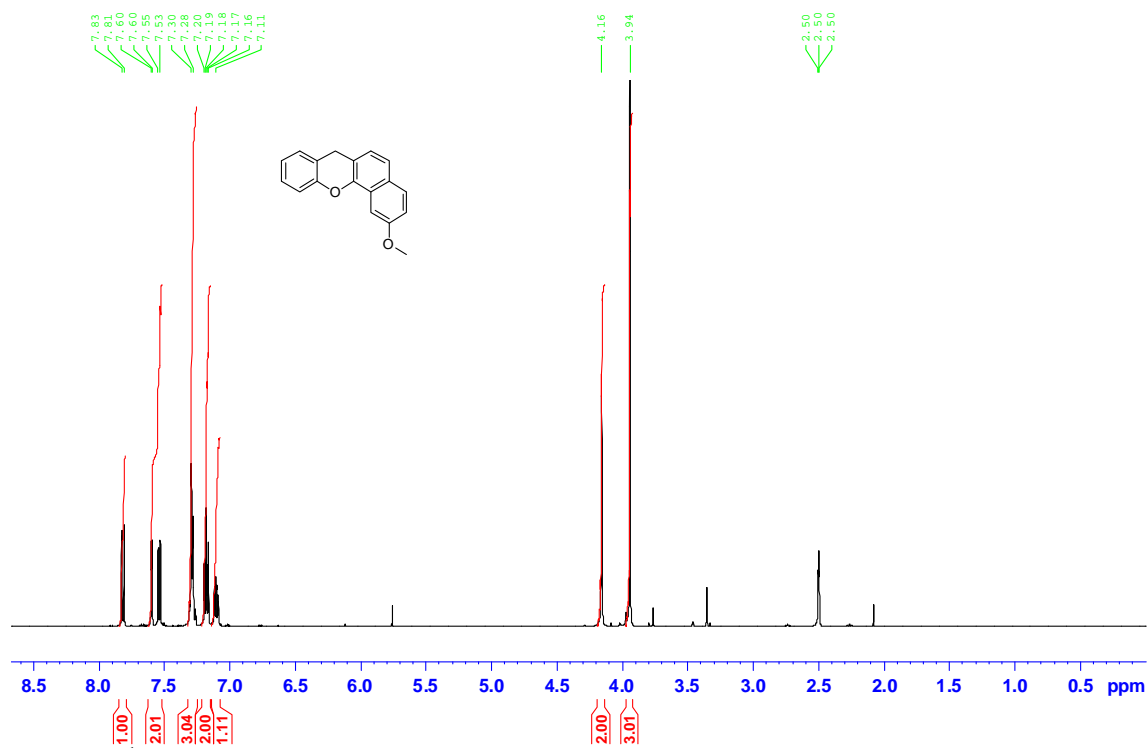

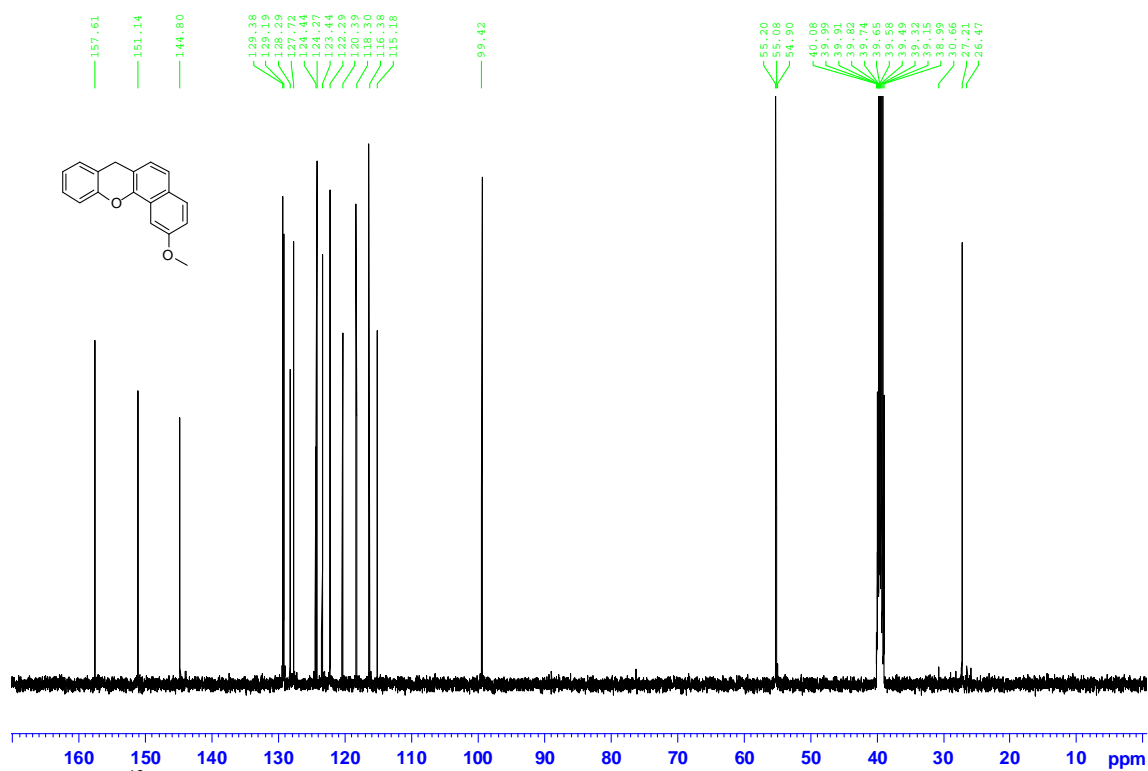

Figure 35:  $^{13}\text{C}$  NMR in DMSO

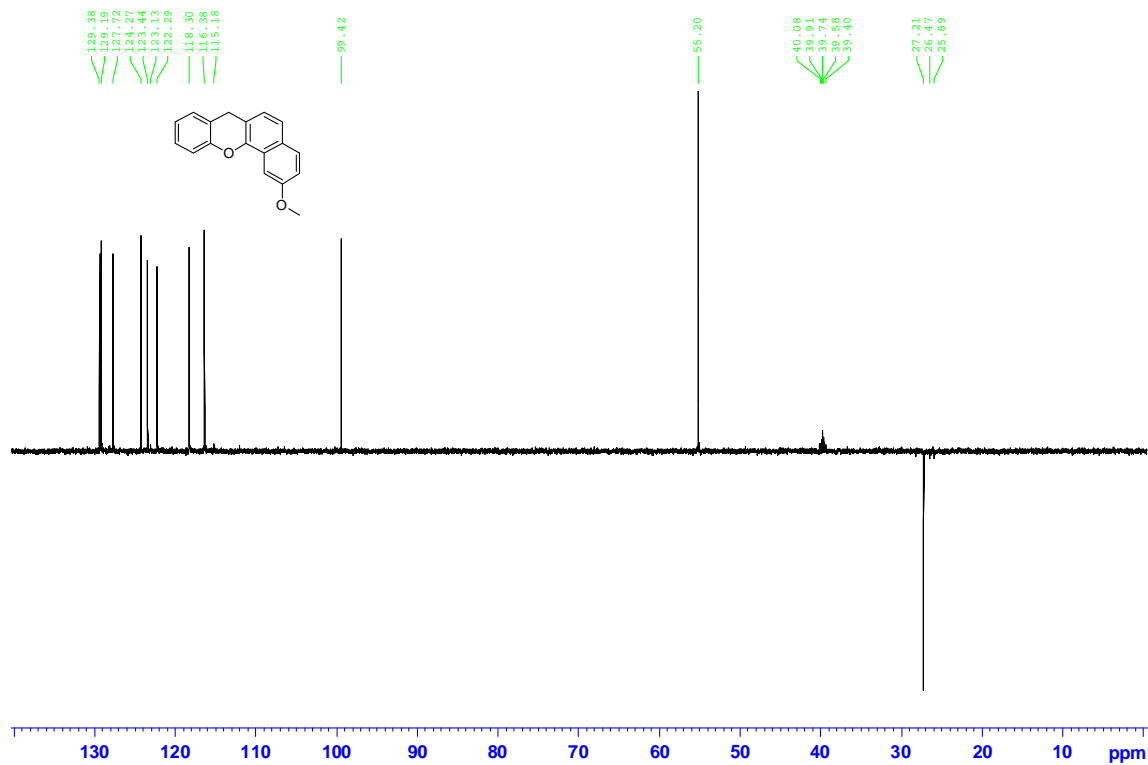

Figure 36: dept135 NMR in DMSO



13,14-dihydrochromeno[3,2a]xanthene **5**

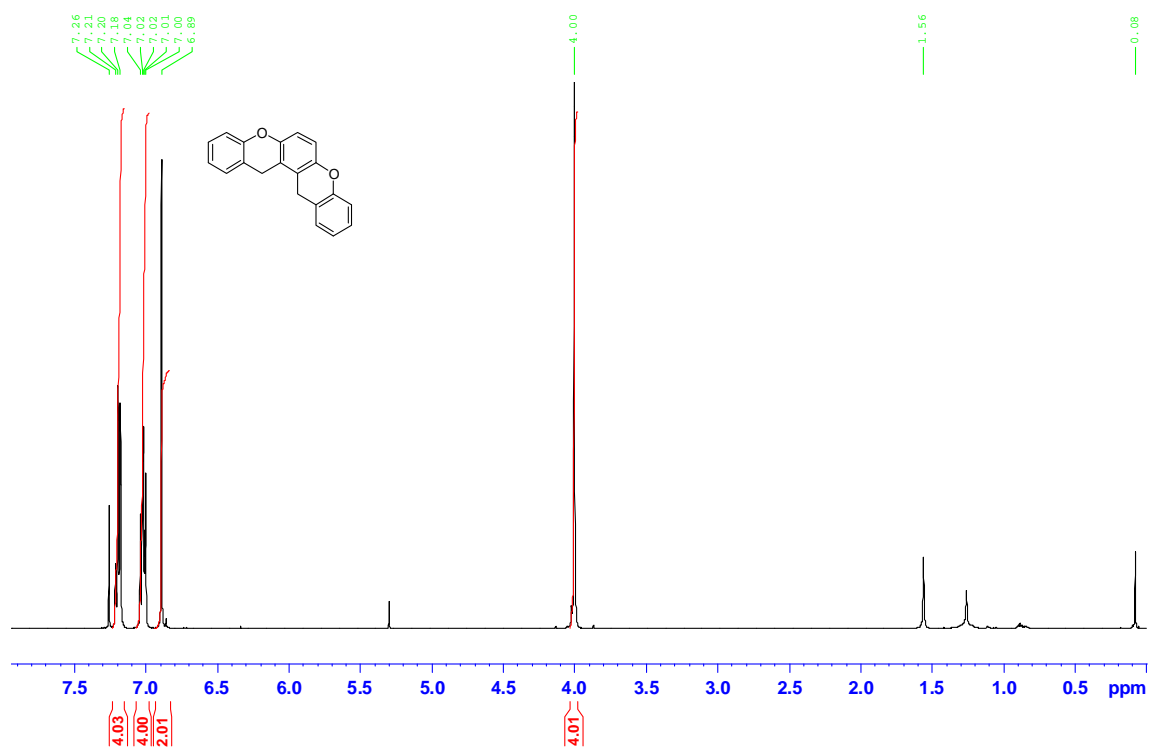

Figure 37:  $^1\text{H}$  NMR in  $\text{CDCl}_3$

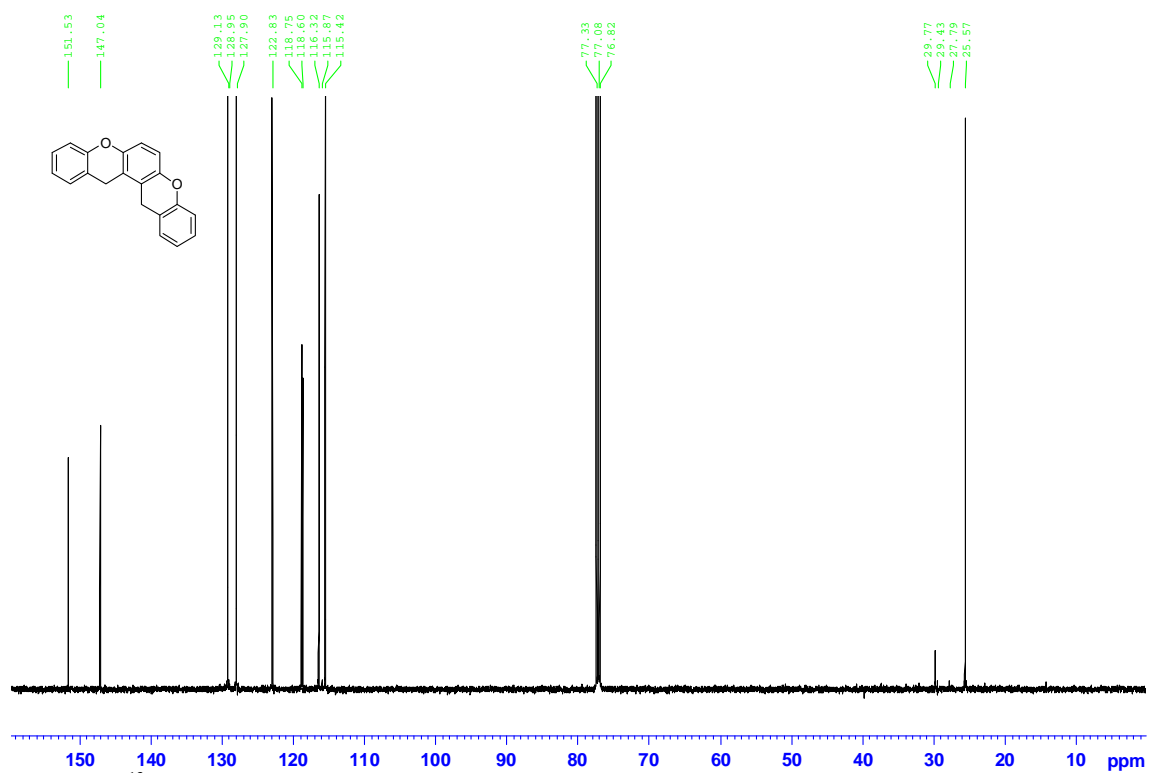

Figure 38:  $^{13}\text{C}$  NMR in  $\text{CDCl}_3$

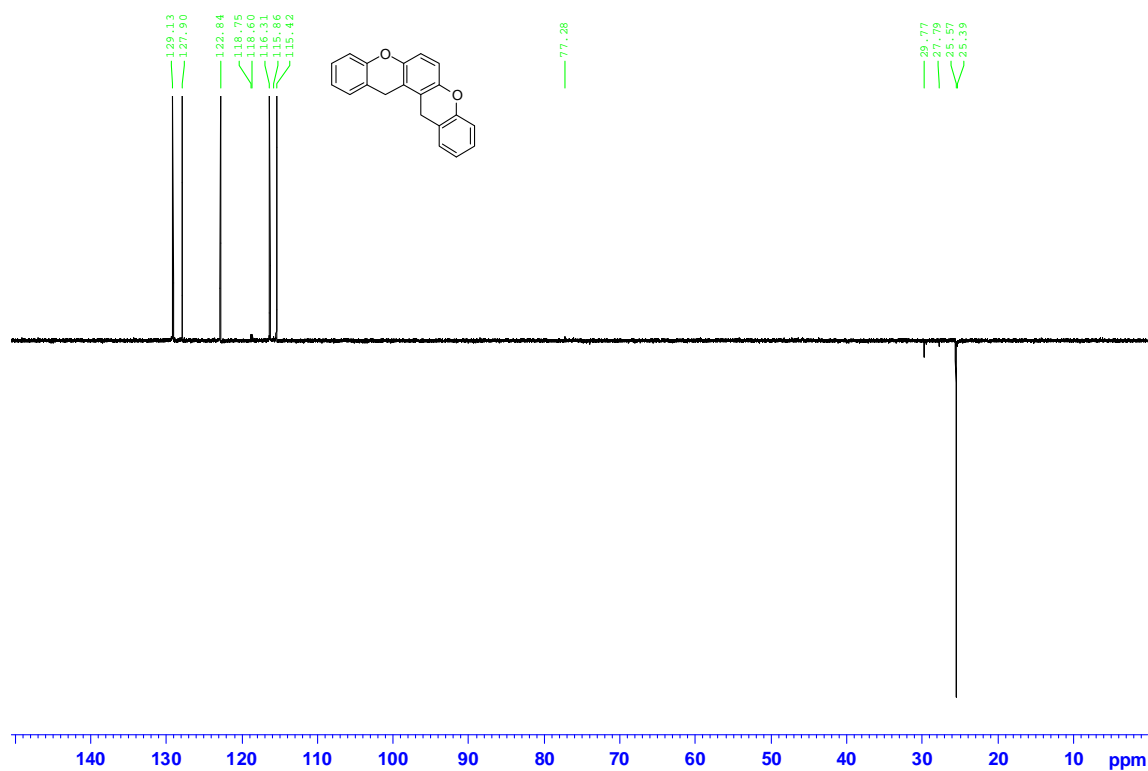

Figure 39: dept135 NMR in CDCl<sub>3</sub>

## IR spectra of products

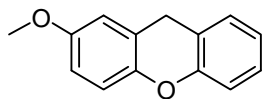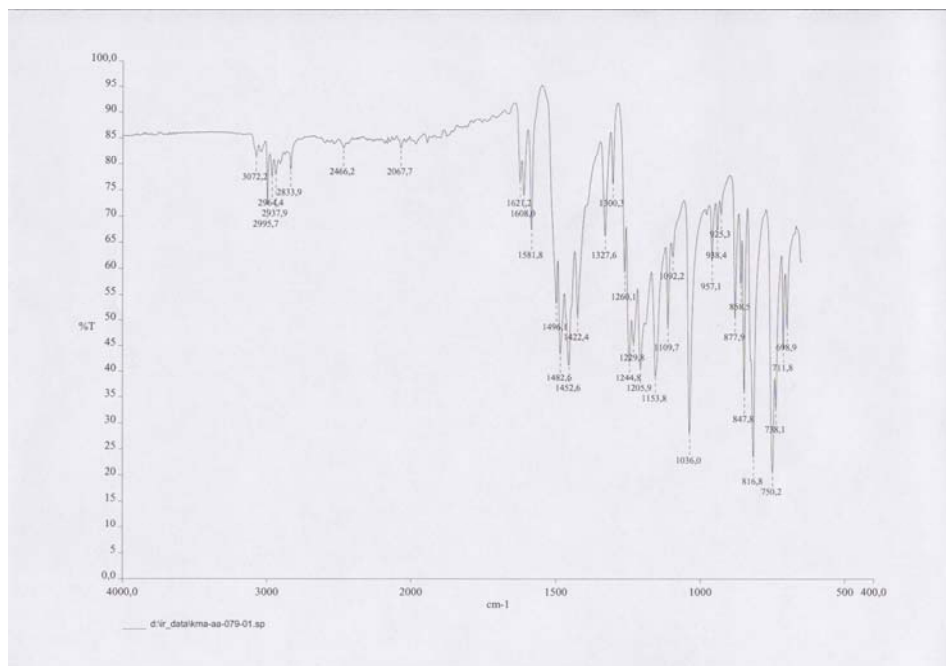

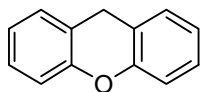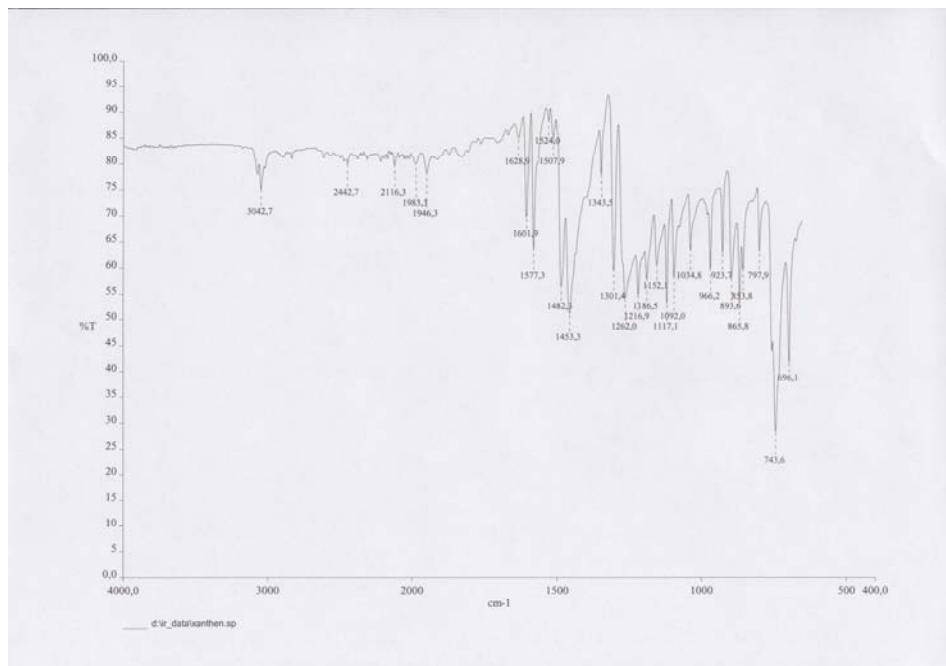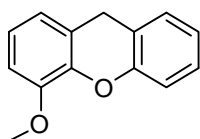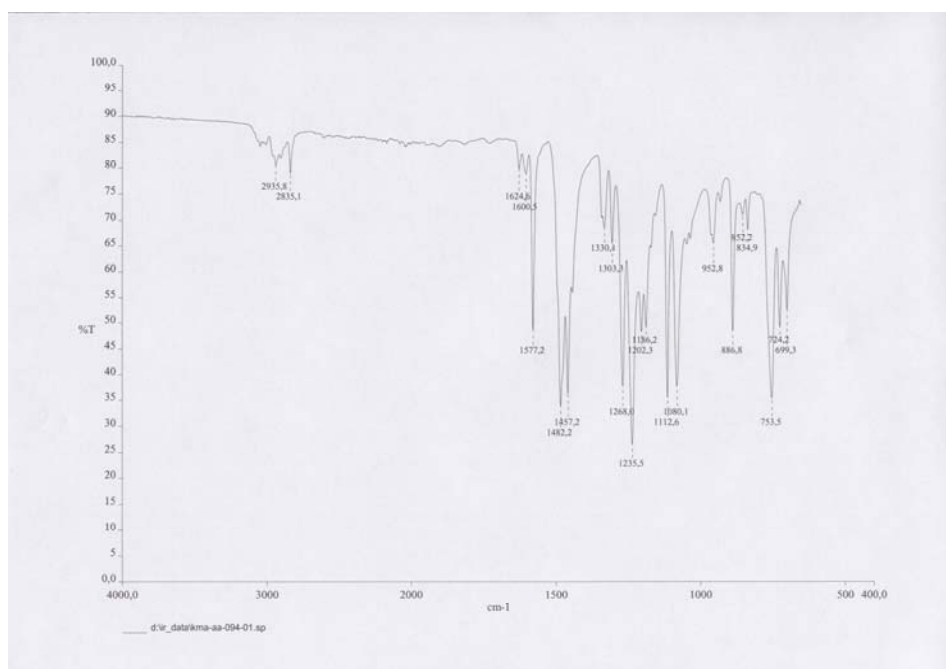

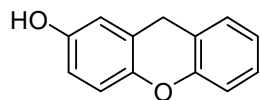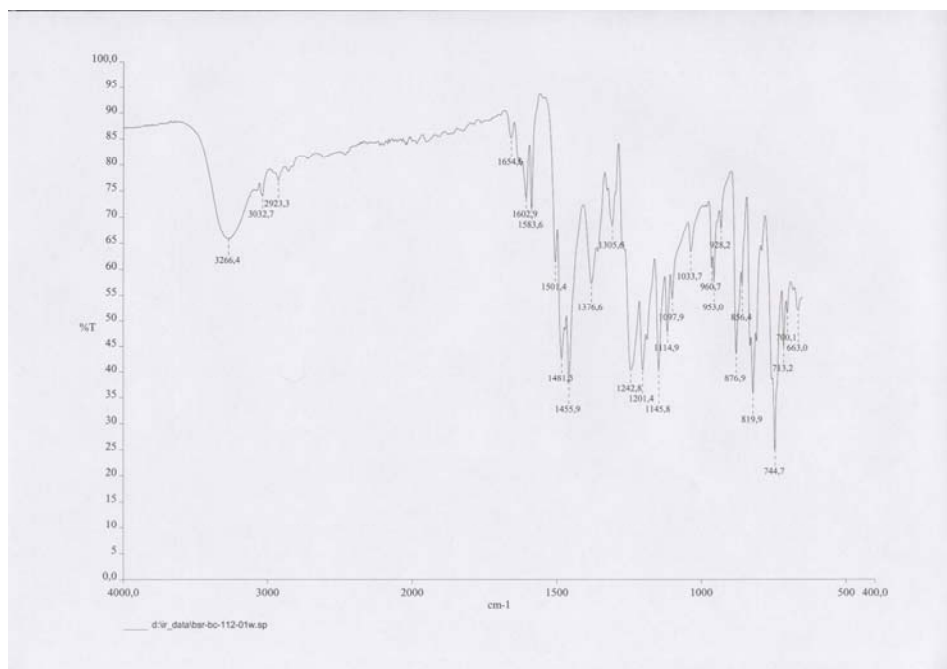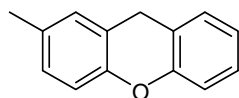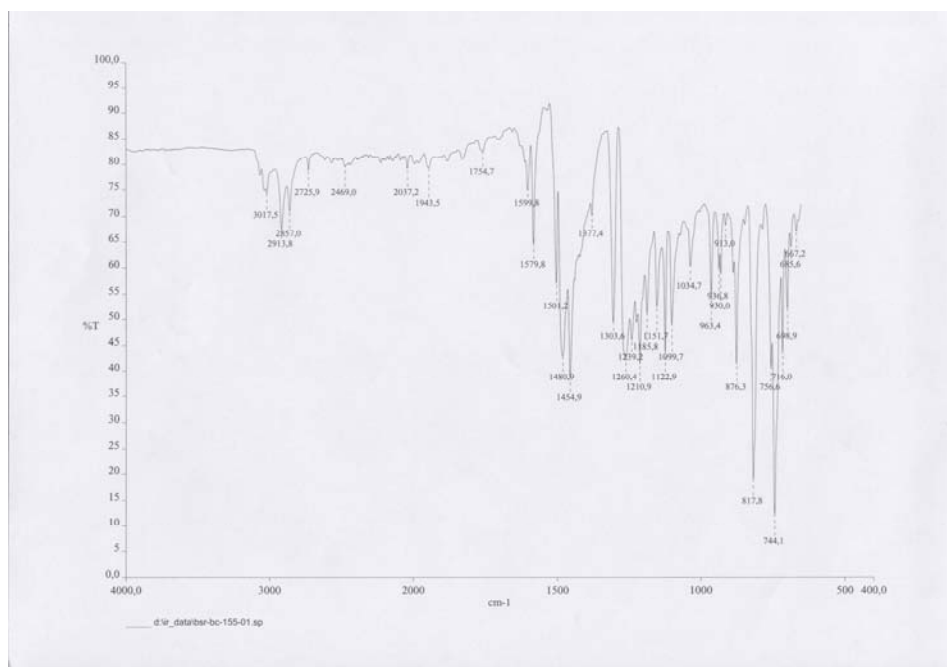

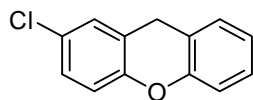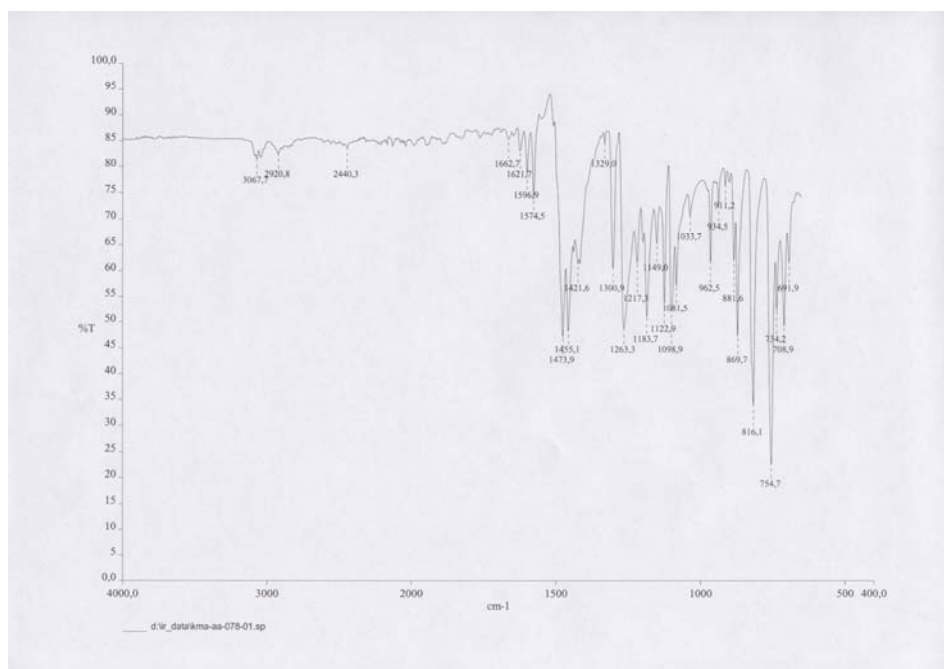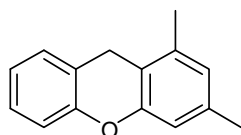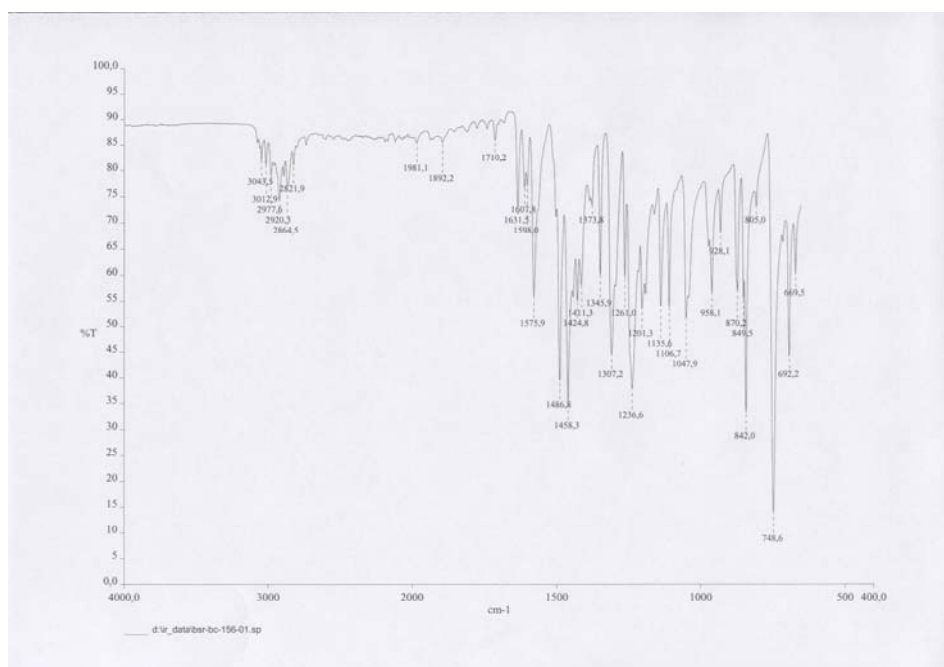

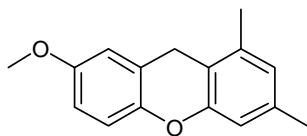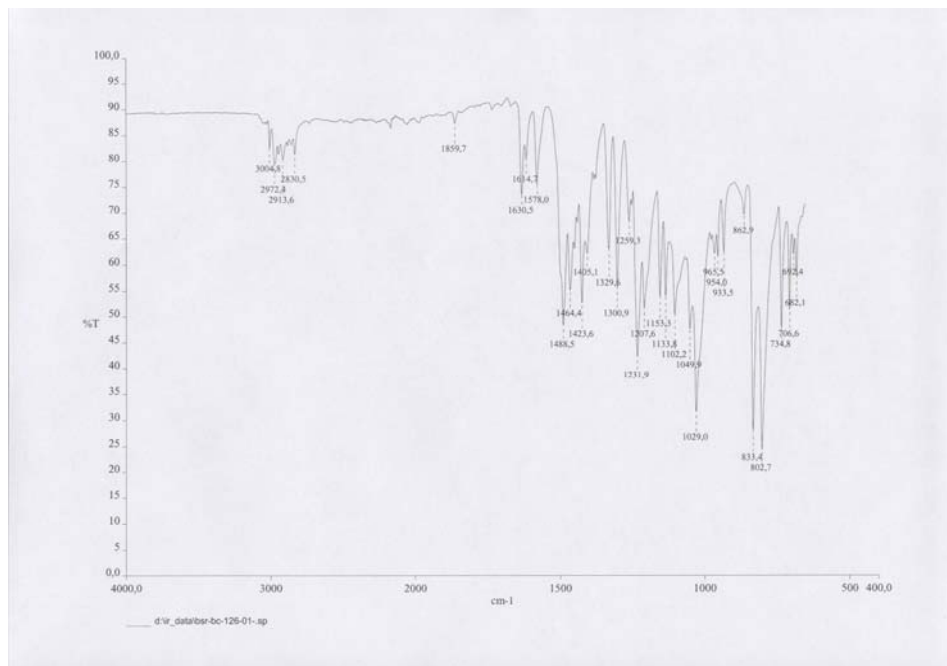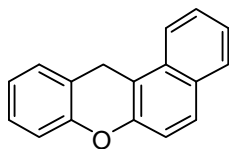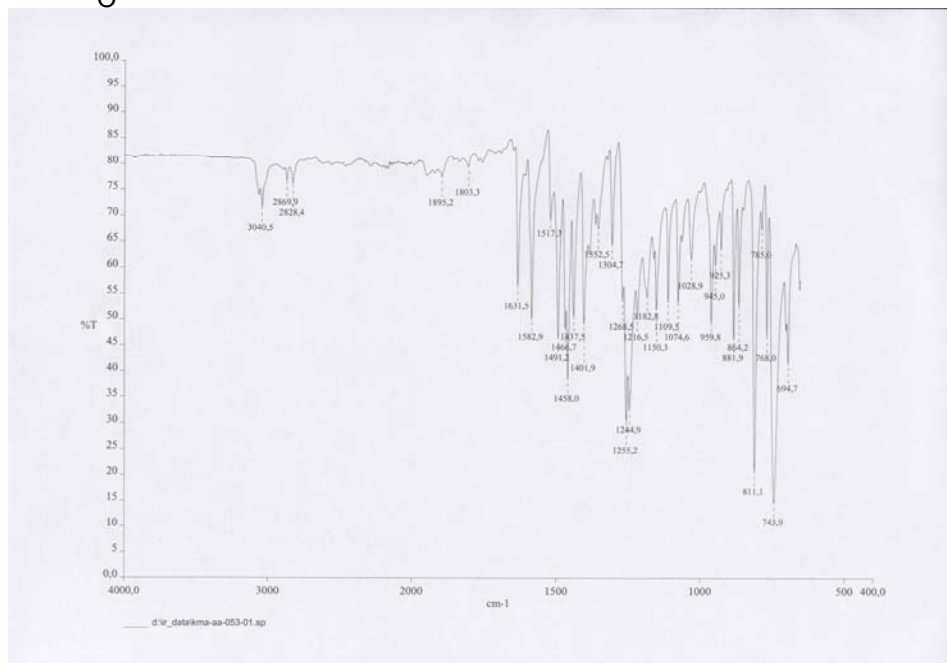

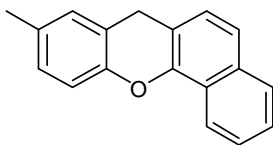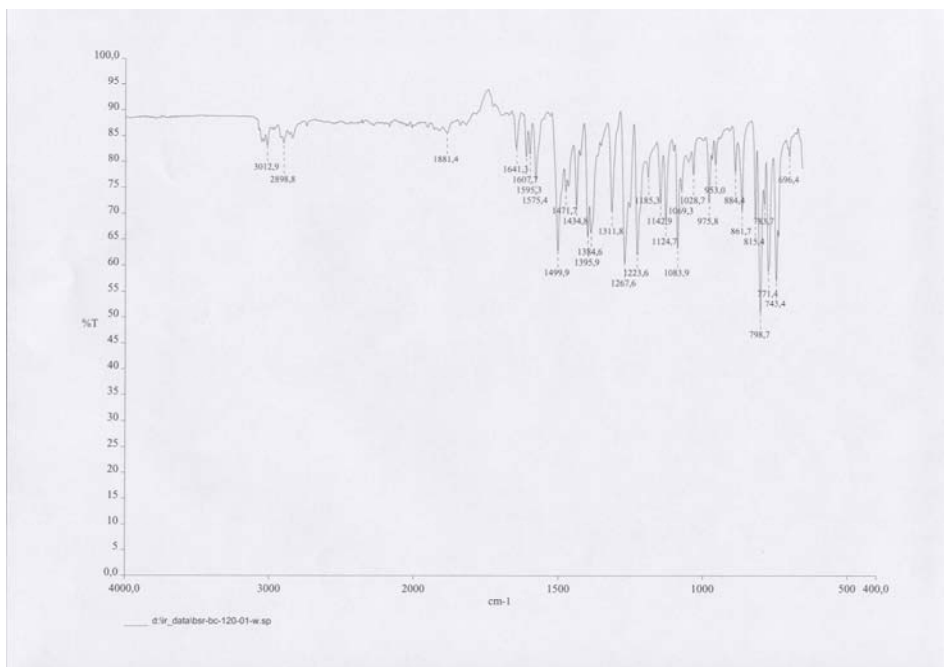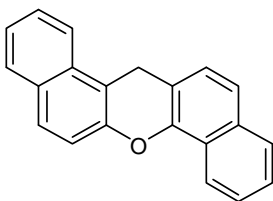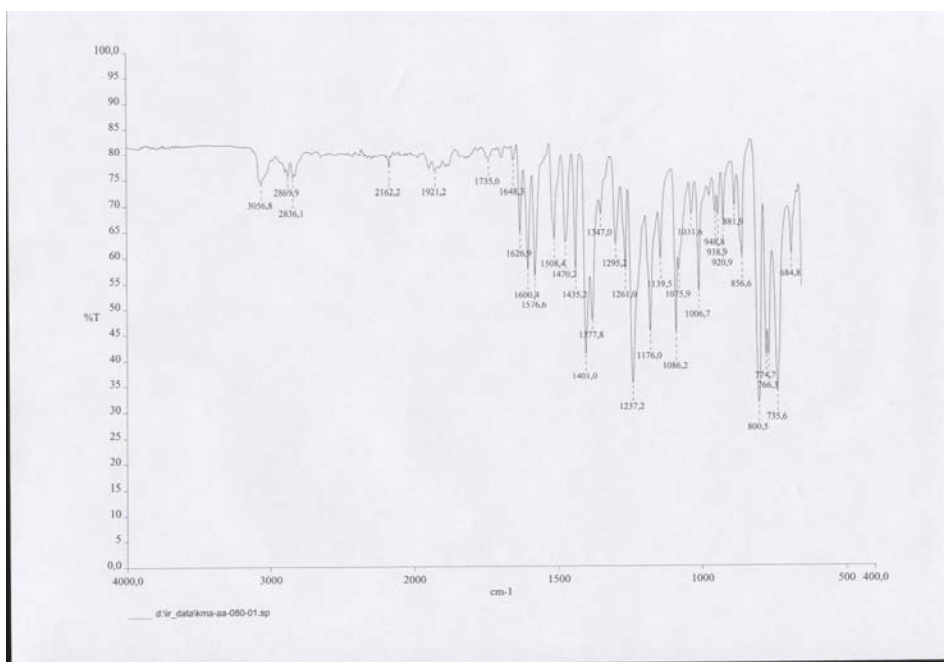

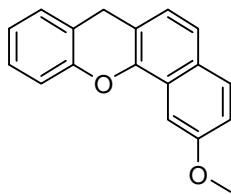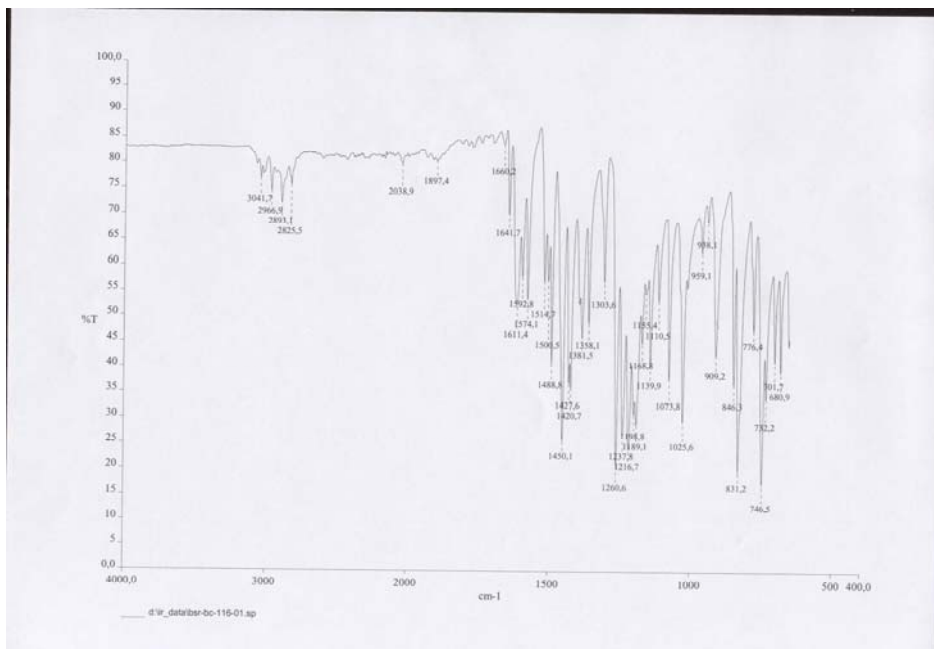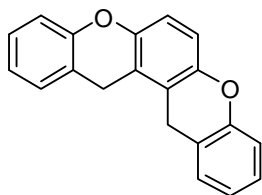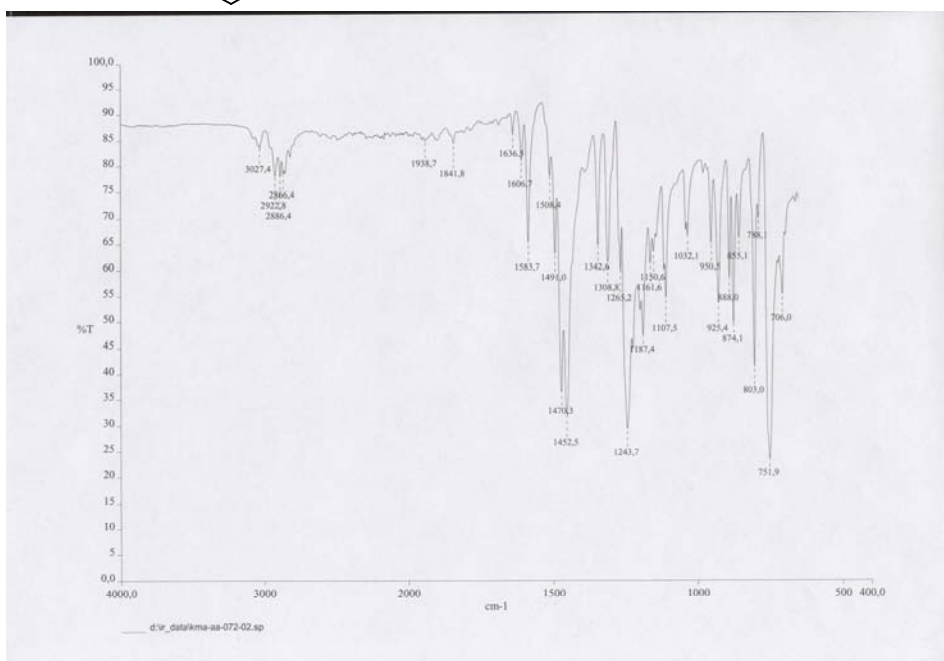



## HPLC analysis

150 mm Chiralpak IC-3 4.6 mm i. D.

n-Heptan/2-Propanol 95:5, 1.0mL/min, 4.9 MPa, 305K

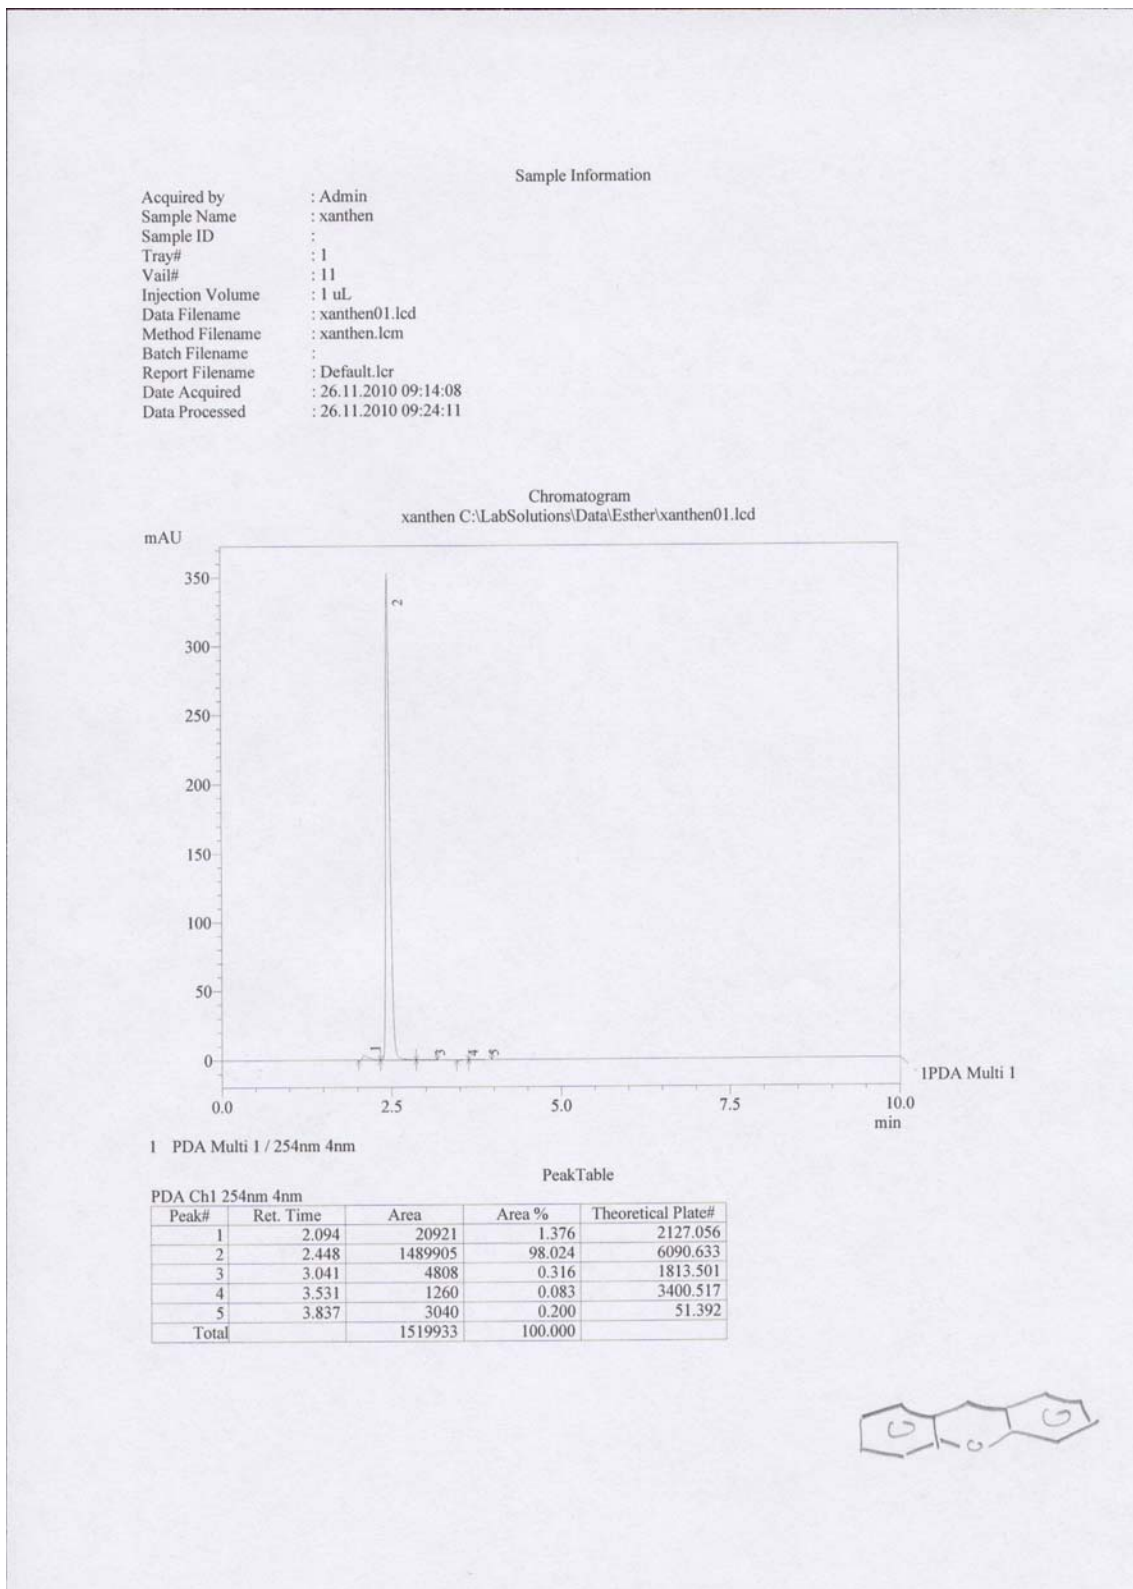

Sample Information

Acquired by : Admin  
 Sample Name : kma-aa-079-01  
 Sample ID :  
 Tray# : 1  
 Vial# : 9  
 Injection Volume : 1 uL  
 Data Filename : kma-aa-079-02.lcd  
 Method Filename : xanthen.lcm  
 Batch Filename :  
 Report Filename : Default.lcr  
 Date Acquired : 26.11.2010 08:39:28  
 Data Processed : 26.11.2010 08:49:31

Chromatogram

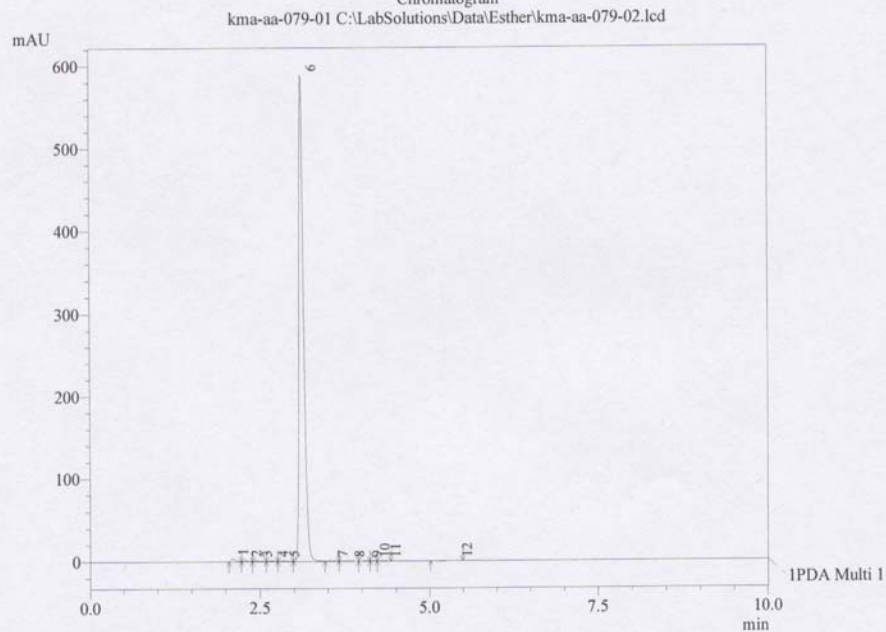

PeakTable

PDA Ch1 254nm 4nm

| Peak# | Ret. Time | Area    | Area %  | Theoretical Plate# |
|-------|-----------|---------|---------|--------------------|
| 1     | 2.089     | 18438   | 0.630   | 3262.376           |
| 2     | 2.283     | 9400    | 0.321   | 3044.159           |
| 3     | 2.439     | 9375    | 0.320   | 2469.871           |
| 4     | 2.678     | 8843    | 0.302   | 2006.206           |
| 5     | 2.840     | 8799    | 0.301   | 1973.620           |
| 6     | 3.114     | 2861127 | 97.746  | 7350.210           |
| 7     | 3.548     | 2333    | 0.080   | 3723.186           |
| 8     | 3.797     | 2550    | 0.087   | 1355.906           |
| 9     | 4.051     | 1998    | 0.068   | 5541.350           |
| 10    | 4.171     | 1050    | 0.036   | 980.766            |
| 11    | 4.328     | 1176    | 0.040   | 3671.823           |
| 12    | 5.394     | 2003    | 0.068   | 2977.878           |
| Total |           | 2927091 | 100.000 |                    |

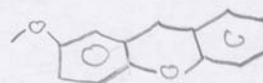

Sample Information

Acquired by : Admin  
 Sample Name : kma-aa-100-01  
 Sample ID :  
 Tray# : 1  
 Vial# : 10  
 Injection Volume : 1 uL  
 Data Filename : kma-aa-100-02.lcd  
 Method Filename : xanthen.lcm  
 Batch Filename :  
 Report Filename : Default.lcr  
 Date Acquired : 26.11.2010 09:02:35  
 Data Processed : 26.11.2010 09:12:37

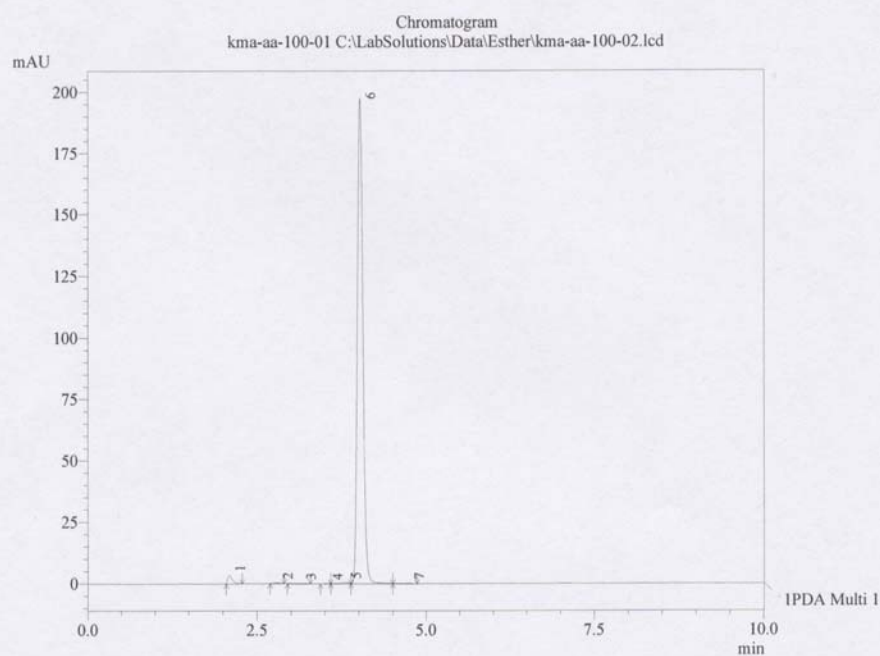

1 PDA Multi 1 / 254nm 4nm

PeakTable

| Peak# | Ret. Time | Area    | Area %  | Theoretical Plate# |
|-------|-----------|---------|---------|--------------------|
| 1     | 2.087     | 16961   | 1.467   | 3640.697           |
| 2     | 2.786     | 3478    | 0.301   | 1966.750           |
| 3     | 3.129     | 3423    | 0.296   | 1037.539           |
| 4     | 3.520     | 1171    | 0.101   | 1587.348           |
| 5     | 3.794     | 6075    | 0.525   | 3814.866           |
| 6     | 4.012     | 1121559 | 97.013  | 9534.361           |
| 7     | 4.731     | 3422    | 0.296   | 1483.458           |
| Total |           | 1156089 | 100.000 |                    |

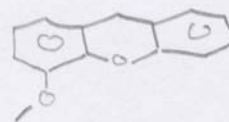

Sample Information

Acquired by : Admin  
 Sample Name : bsr-bc-112-01  
 Sample ID :  
 Tray# : 1  
 Vial# : 2  
 Injection Volume : 1 uL  
 Data Filename : bsr-bc-112-01.lcd  
 Method Filename : xanthen.lcm  
 Batch Filename :  
 Report Filename : Default.lcr  
 Date Acquired : 23.11.2010 10:10:47  
 Data Processed : 23.11.2010 10:20:50

Chromatogram

bsr-bc-112-01 C:\LabSolutions\Data\Esther\bsr-bc-112-01.lcd

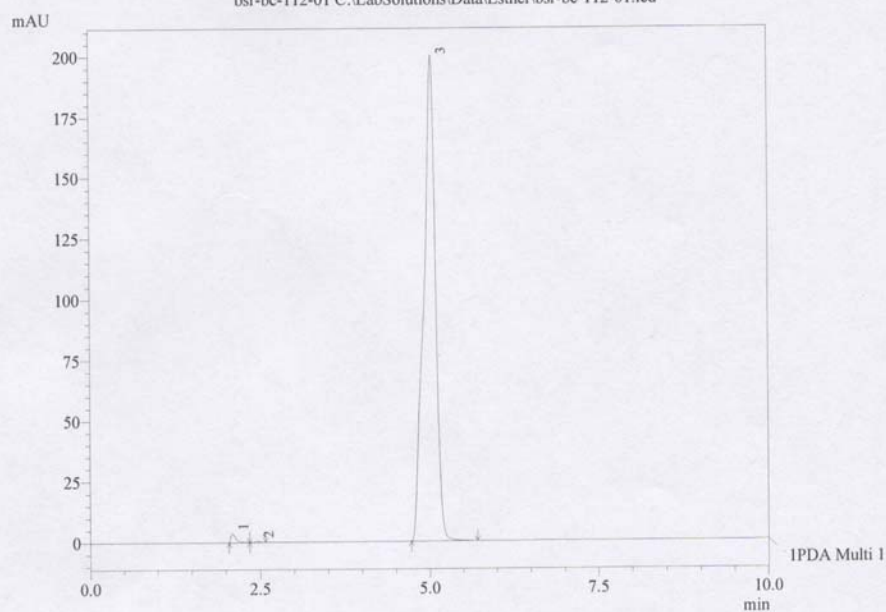

1 PDA Multi 1 / 254nm 4nm

PeakTable

PDA Ch1 254nm 4nm

| Peak# | Ret. Time | Area    | Area %  | Theoretical Plate# |
|-------|-----------|---------|---------|--------------------|
| 1     | 2.088     | 19288   | 0.796   | 3526.559           |
| 2     | 2.457     | 2443    | 0.101   | 4385.284           |
| 3     | 5.037     | 2402160 | 99.103  | 4145.897           |
| Total |           | 2423891 | 100.000 |                    |

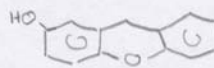

Sample Information

Acquired by : Admin  
 Sample Name : kma-aa-101-01  
 Sample ID :  
 Tray# : 1  
 Vial# : 12  
 Injection Volume : 1 uL  
 Data Filename : kma-aa-101-03.lcd  
 Method Filename : xanthen.lcm  
 Batch Filename :  
 Report Filename : Default.lcr  
 Date Acquired : 26.11.2010 10:00:29  
 Data Processed : 26.11.2010 10:10:31

Chromatogram

kma-aa-101-01 C:\LabSolutions\Data\Esther\kma-aa-101-03.lcd

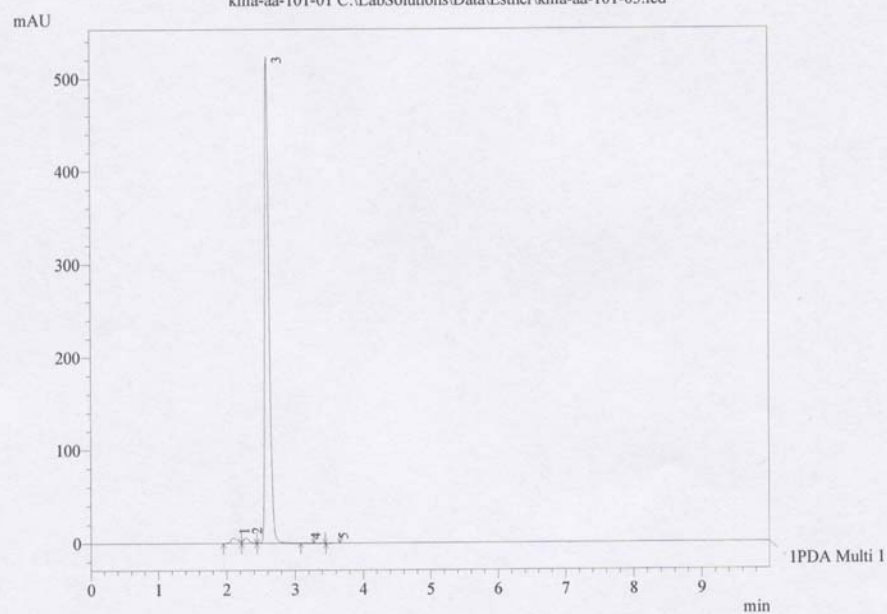

I PDA Multi 1 / 254nm 4nm

PeakTable

PDA Ch1 254nm 4nm

| Peak# | Ret. Time | Area    | Area %  | Theoretical Plate# |
|-------|-----------|---------|---------|--------------------|
| 1     | 2.096     | 41722   | 1.738   | 1437.512           |
| 2     | 2.279     | 33844   | 1.410   | 3151.143           |
| 3     | 2.594     | 2321725 | 96.742  | 5922.510           |
| 4     | 3.140     | 1295    | 0.054   | 4498.726           |
| 5     | 3.544     | 1327    | 0.055   | 6017.288           |
| Total |           | 2399913 | 100.000 |                    |

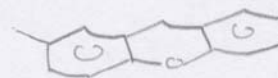

Sample Information

Acquired by : Admin  
Sample Name : kma-aa-102-01  
Sample ID :  
Tray# : 1  
Vial# : 15  
Injection Volume : 1 uL  
Data Filename : kma-aa-102-01.lcd  
Method Filename : xanthen.lcm  
Batch Filename :  
Report Filename : Default.lcr  
Date Acquired : 27.11.2010 11:09:09  
Data Processed : 27.11.2010 11:19:11

Chromatogram

kma-aa-102-01 C:\LabSolutions\Data\Esther\kma-aa-102-01.lcd

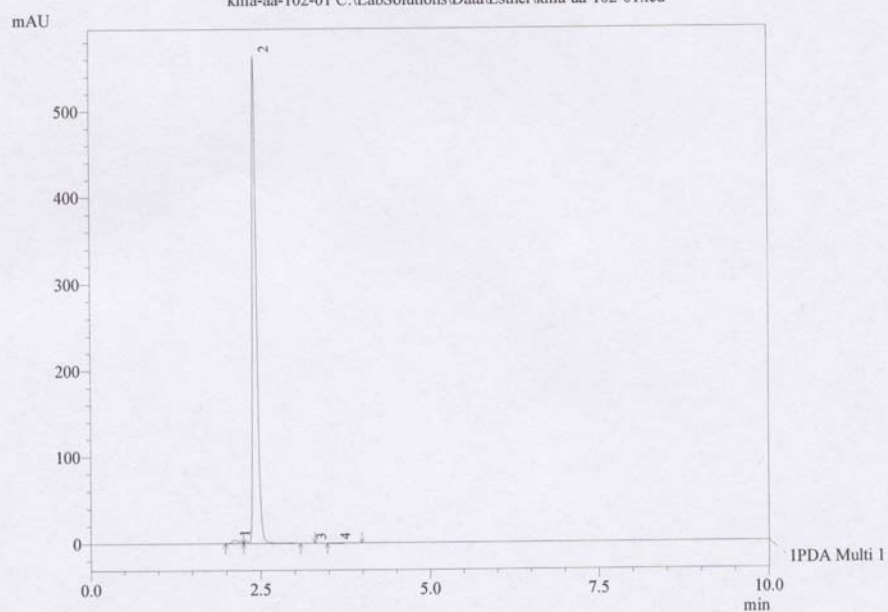

1 PDA Multi 1 / 254nm 4nm

PeakTable

PDA Ch1 254nm 4nm

| Peak# | Ret. Time | Area    | Area %  | Theoretical Plate# |
|-------|-----------|---------|---------|--------------------|
| 1     | 2.105     | 27694   | 1.121   | 1481.754           |
| 2     | 2.420     | 2437694 | 98.668  | 5524.062           |
| 3     | 3.221     | 1095    | 0.044   | 3138.598           |
| 4     | 3.576     | 4112    | 0.166   | 800.854            |
| Total |           | 2470595 | 100.000 |                    |

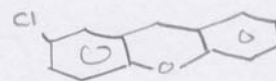

Sample Information

Acquired by : Admin  
 Sample Name : bsr-bc-125-01  
 Sample ID :  
 Tray# : 1  
 Vial# : 1  
 Injection Volume : 1 uL  
 Data Filename : bsr-bc-125-09.lcd  
 Method Filename : xanthen.lcm  
 Batch Filename :  
 Report Filename : Default.lcr  
 Date Acquired : 23.11.2010 09:48:02  
 Data Processed : 23.11.2010 09:58:22

Chromatogram

bsr-bc-125-01 C:\LabSolutions\Data\Esther\bsr-bc-125-09.lcd

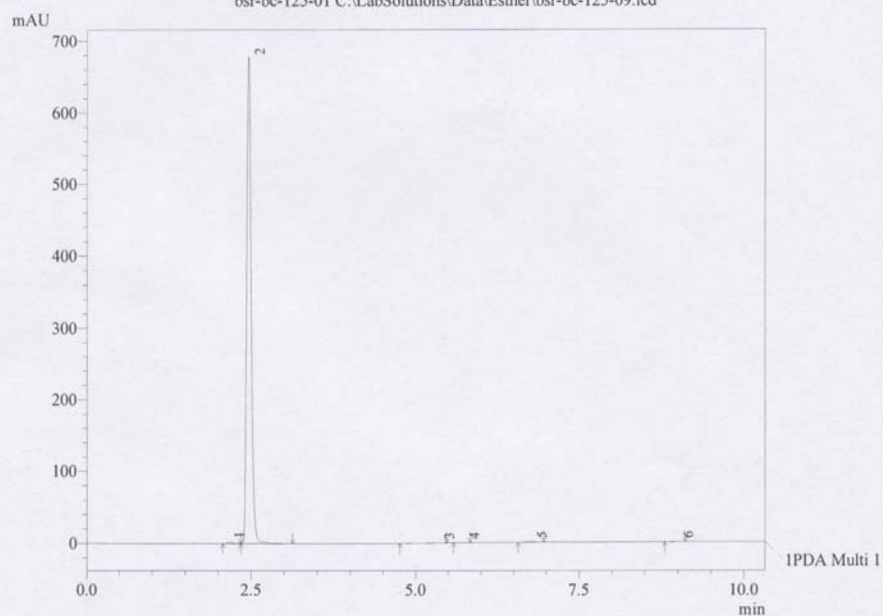

1 PDA Multi 1 / 254nm 4nm

PeakTable

PDA Ch1 254nm 4nm

| Peak# | Ret. Time | Area    | Area %  | Theoretical Plate# |
|-------|-----------|---------|---------|--------------------|
| 1     | 2.153     | 12876   | 0.403   | 3016.295           |
| 2     | 2.454     | 3169188 | 99.171  | 4923.919           |
| 3     | 5.344     | 4944    | 0.155   | 1777.846           |
| 4     | 5.728     | 1068    | 0.033   | 549.442            |
| 5     | 6.764     | 5693    | 0.178   | 12404.289          |
| 6     | 8.985     | 1909    | 0.060   | 16183.923          |
| Total |           | 3195679 | 100.000 |                    |

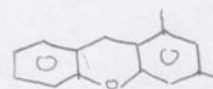

Sample Information

Acquired by : Admin  
 Sample Name : bsr-bc-126-01  
 Sample ID :  
 Tray# : 1  
 Vial# : 3  
 Injection Volume : 1 uL  
 Data Filename : bsr-bc-126-03.lcd  
 Method Filename : xanthen.lcm  
 Batch Filename :  
 Report Filename : Default.lcr  
 Date Acquired : 26.11.2010 04:06:06  
 Data Processed : 26.11.2010 04:16:08

Chromatogram

bsr-bc-126-01 C:\LabSolutions\Data\Ester\bsr-bc-126-03.lcd

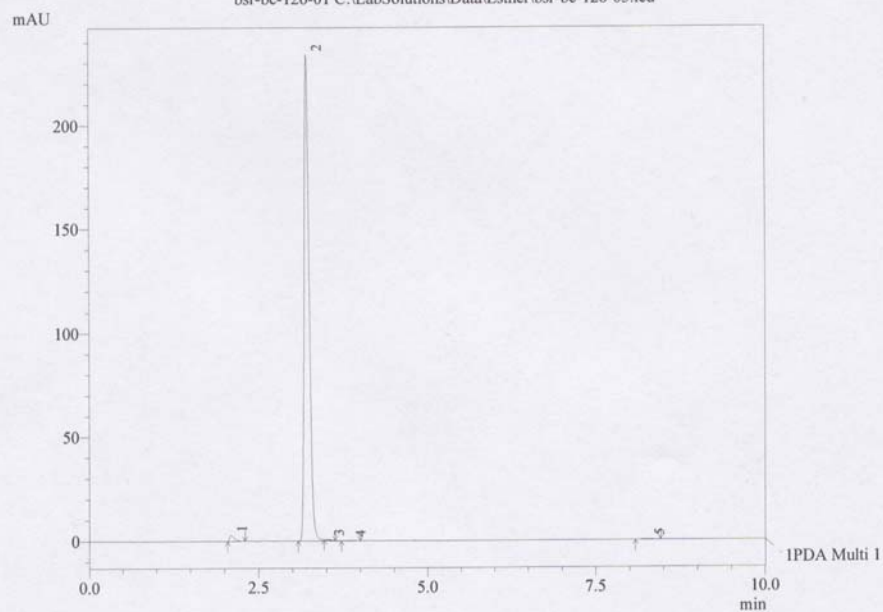

1 PDA Multi 1 / 254nm 4nm

PeakTable

PDA Ch1 254nm 4nm

| Peak# | Ret. Time | Area    | Area %  | Theoretical Plate# |
|-------|-----------|---------|---------|--------------------|
| 1     | 2.095     | 14330   | 1.184   | 3565.707           |
| 2     | 3.210     | 1192019 | 98.474  | 7372.247           |
| 3     | 3.522     | 1328    | 0.110   | 9252.920           |
| 4     | 3.838     | 1164    | 0.096   | 4844.160           |
| 5     | 8.273     | 1653    | 0.137   | 12704.892          |
| Total |           | 1210493 | 100.000 |                    |

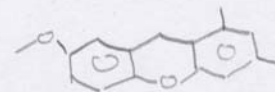



Sample Information

Acquired by : Admin  
 Sample Name : kma-aa-045-01  
 Sample ID :  
 Tray# : 1  
 Vial# : 5  
 Injection Volume : 1 uL  
 Data Filename : kma-aa-045-02.lcd  
 Method Filename : xanthen.lcm  
 Batch Filename :  
 Report Filename : Default.lcr  
 Date Acquired : 26.11.2010 05:06:07  
 Data Processed : 26.11.2010 05:16:09

Chromatogram

kma-aa-045-01 C:\LabSolutions\Data\Ester\kma-aa-045-02.lcd

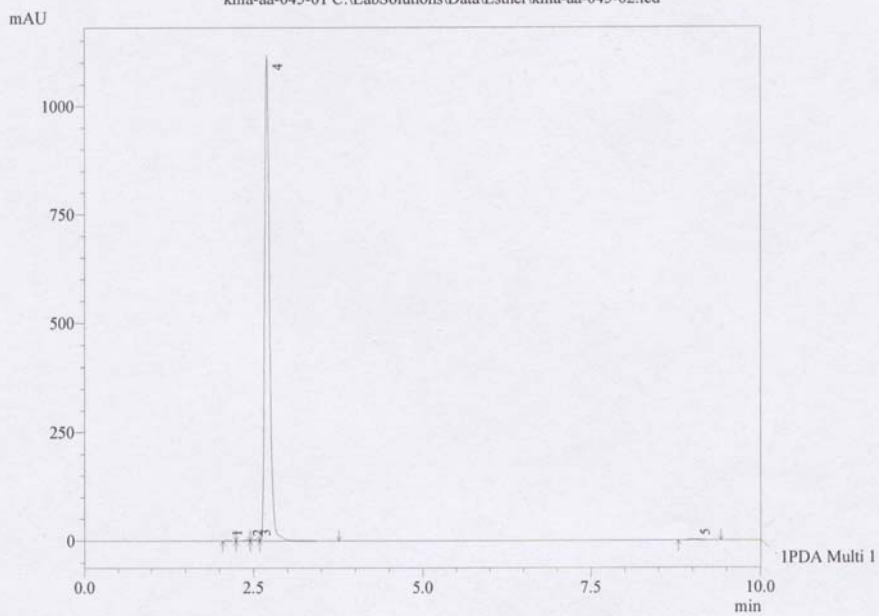

1 PDA Multi 1 / 254nm 4nm

PeakTable

PDA Ch1 254nm 4nm

| Peak# | Ret. Time | Area    | Area %  | Theoretical Plate# |
|-------|-----------|---------|---------|--------------------|
| 1     | 2.095     | 13184   | 0.230   | 3123.960           |
| 2     | 2.397     | 15537   | 0.271   | 3235.936           |
| 3     | 2.510     | 20534   | 0.358   | 2940.275           |
| 4     | 2.692     | 5651135 | 98.619  | 5450.934           |
| 5     | 9.019     | 29901   | 0.522   | 11836.294          |
| Total |           | 5730291 | 100.000 |                    |

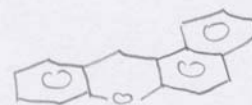

Sample Information

Acquired by : Admin  
 Sample Name : bsr-bc-120-01  
 Sample ID :  
 Tray# : 1  
 Vial# : 1  
 Injection Volume : 1 uL  
 Data Filename : bsr-bc-120-04.lcd  
 Method Filename : xanthen.lcm  
 Batch Filename :  
 Report Filename : Default.lcr  
 Date Acquired : 28.11.2010 09:26:24  
 Data Processed : 28.11.2010 09:36:28

Chromatogram

bsr-bc-120-01 C:\LabSolutions\Data\Esther\bsr-bc-120-04.lcd

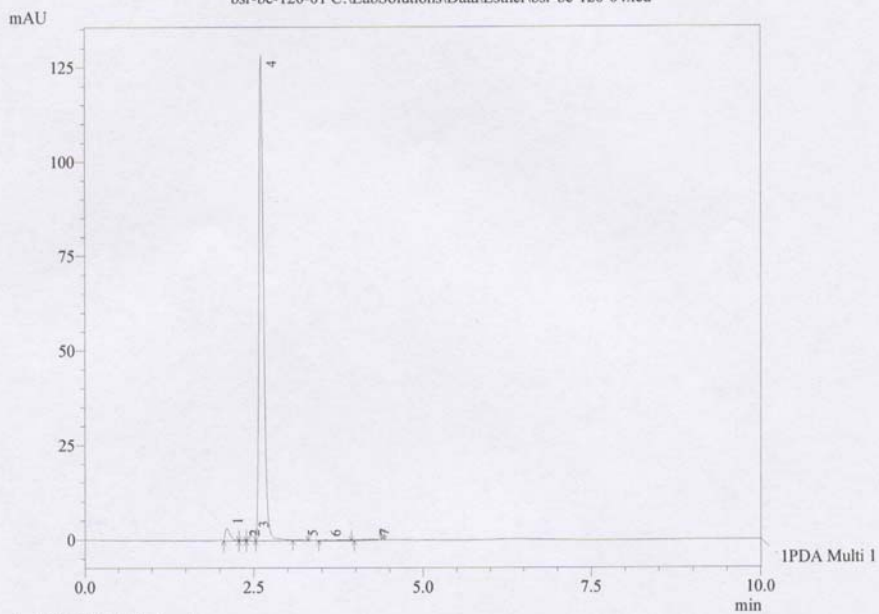

1 PDA Multi 1 / 254nm 4nm

PeakTable

PDA Ch1 254nm 4nm

| Peak# | Ret. Time | Area   | Area %  | Theoretical Plate# |
|-------|-----------|--------|---------|--------------------|
| 1     | 2.098     | 17164  | 2.725   | 3559.678           |
| 2     | 2.347     | 1289   | 0.205   | 14.364             |
| 3     | 2.480     | 11539  | 1.832   | 4613.327           |
| 4     | 2.606     | 592441 | 94.043  | 5687.182           |
| 5     | 3.200     | 1009   | 0.160   | 3648.293           |
| 6     | 3.540     | 3759   | 0.597   | 53.051             |
| 7     | 4.260     | 2766   | 0.439   | 14.774             |
| Total |           | 629968 | 100.000 |                    |

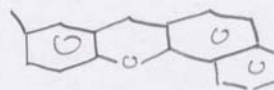

Sample Information

Acquired by : Admin  
 Sample Name : kma-aa-082-01  
 Sample ID :  
 Tray# : 1  
 Vial# : 14  
 Injection Volume : 1 uL  
 Data Filename : kma-aa-082-02.lcd  
 Method Filename : xanthen.lcm  
 Batch Filename :  
 Report Filename : Default.lcr  
 Date Acquired : 27.11.2010 08:50:49  
 Data Processed : 27.11.2010 09:00:51

Chromatogram

kma-aa-082-01 C:\LabSolutions\Data\Esther\kma-aa-082-02.lcd

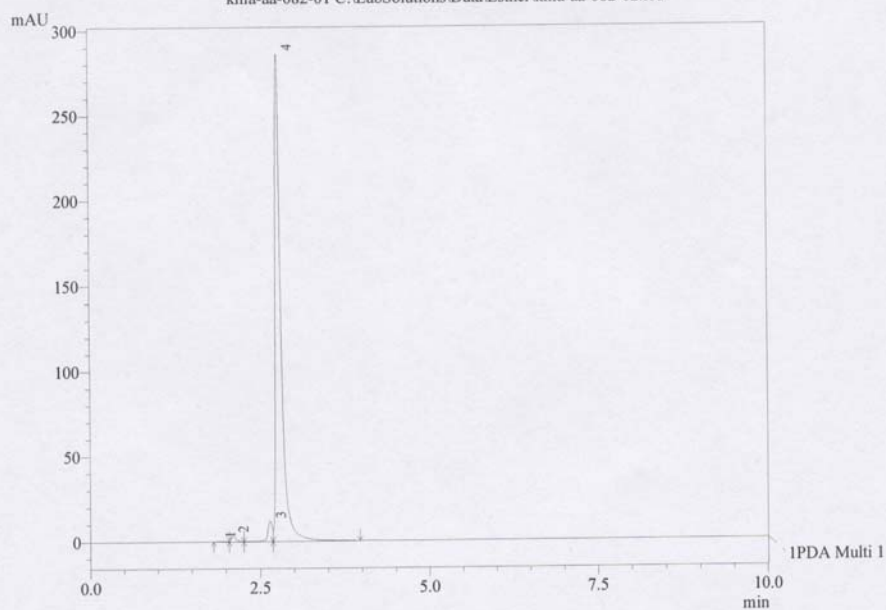

1 PDA Multi 1 / 254nm 4nm

PeakTable

PDA Ch1 254nm 4nm

| Peak# | Ret. Time | Area    | Area %  | Theoretical Plate# |
|-------|-----------|---------|---------|--------------------|
| 1     | 1.899     | 1878    | 0.109   | 1065.489           |
| 2     | 2.090     | 17416   | 1.011   | 3438.231           |
| 3     | 2.640     | 59358   | 3.444   | 5204.090           |
| 4     | 2.773     | 1644690 | 95.436  | 5136.476           |
| Total |           | 1723342 | 100.000 |                    |

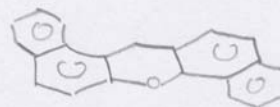

Sample Information

Acquired by : Admin  
 Sample Name : bsr-bc-116-01  
 Sample ID :  
 Tray# : 1  
 Vial# : 4  
 Injection Volume : 1 uL  
 Data Filename : bsr-bc-116-01.lcd  
 Method Filename : xanthen.lcm  
 Batch Filename :  
 Report Filename : Default.lcr  
 Date Acquired : 26.11.2010 04:29:03  
 Data Processed : 26.11.2010 04:39:05

Chromatogram

bsr-bc-116-01 C:\LabSolutions\Data\Esther\bsr-bc-116-01.lcd

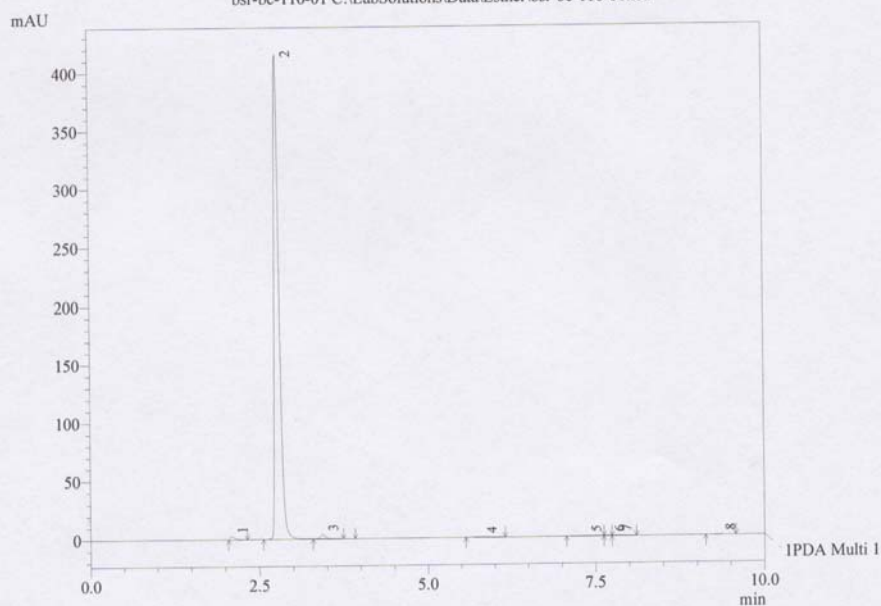

1 PDA Multi 1 / 254nm 4nm

PeakTable

PDA Ch1 254nm 4nm

| Peak# | Ret. Time | Area    | Area %  | Theoretical Plate# |
|-------|-----------|---------|---------|--------------------|
| 1     | 2.088     | 14047   | 0.654   | 3455.316           |
| 2     | 2.775     | 2093345 | 97.448  | 5755.101           |
| 3     | 3.428     | 19224   | 0.895   | 8234.586           |
| 4     | 5.792     | 6186    | 0.288   | 2499.159           |
| 5     | 7.349     | 5419    | 0.252   | 0.289              |
| 6     | 7.691     | 1799    | 0.084   | 338.878            |
| 7     | 7.795     | 5292    | 0.246   | 2412.304           |
| 8     | 9.330     | 2862    | 0.133   | 10422.033          |
| Total |           | 2148175 | 100.000 |                    |

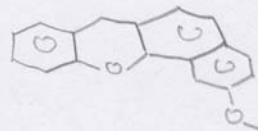

Sample Information

Acquired by : Admin  
 Sample Name : kma-aa-088-01  
 Sample ID :  
 Tray# : 1  
 Vial# : 16  
 Injection Volume : 1 uL  
 Data Filename : kma-aa-088-01.lcd  
 Method Filename : xanthen.lcm  
 Batch Filename :  
 Report Filename : Default.lcr  
 Date Acquired : 28.11.2010 08:42:04  
 Data Processed : 28.11.2010 08:52:08

Chromatogram

kma-aa-088-01 C:\LabSolutions\Data\Esther\kma-aa-088-01.lcd

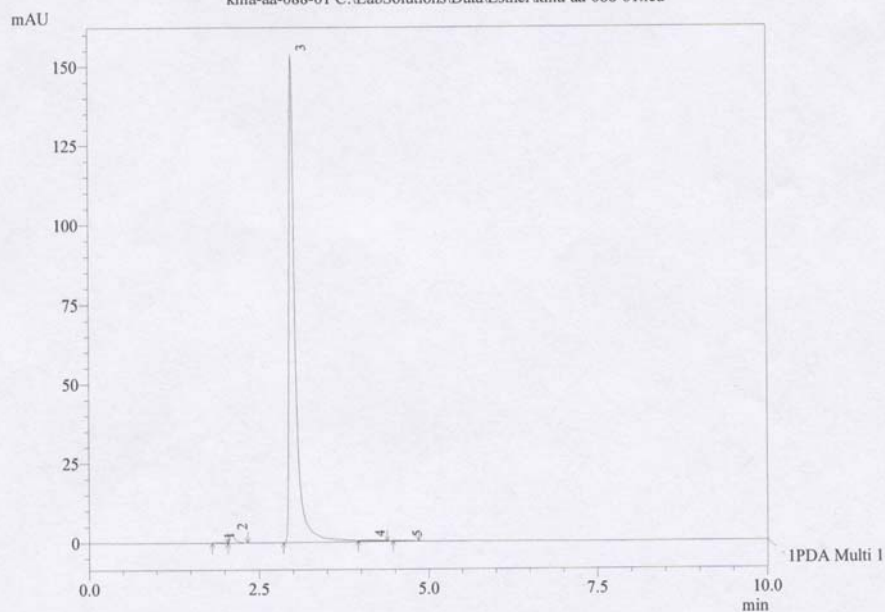

1 PDA Multi 1 / 254nm 4nm

PeakTable

PDA Ch1 254nm 4nm

| Peak# | Ret. Time | Area    | Area %  | Theoretical Plate# |
|-------|-----------|---------|---------|--------------------|
| 1     | 1.899     | 1993    | 0.197   | 636.979            |
| 2     | 2.089     | 15666   | 1.548   | 3541.543           |
| 3     | 2.983     | 989004  | 97.697  | 5110.708           |
| 4     | 4.112     | 3782    | 0.374   | 907.281            |
| 5     | 4.661     | 1868    | 0.185   | 14.454             |
| Total |           | 1012313 | 100.000 |                    |

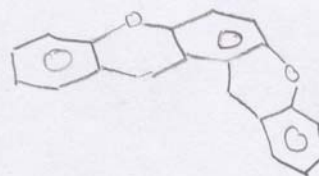

## X-ray analysis

Single crystals of **3h** and **3j** were recrystallised from Et<sub>2</sub>O / pentane, mounted in inert oil and transferred to the cold gas stream of the diffractometer.

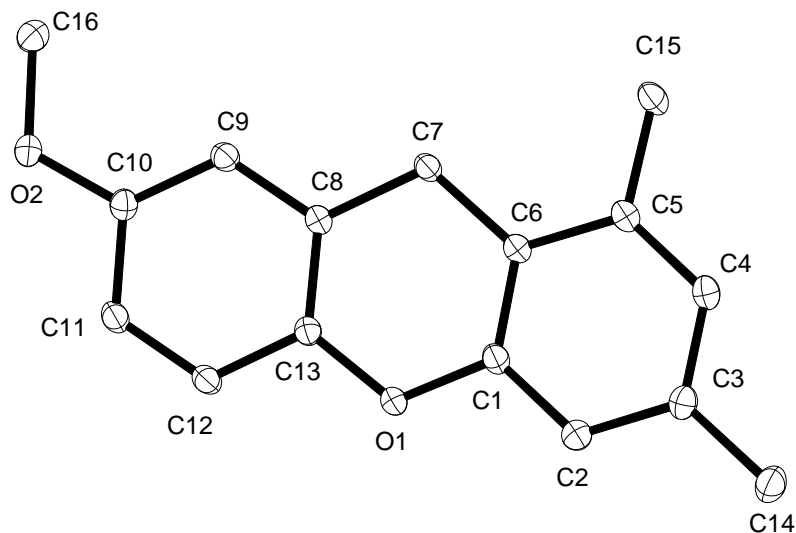

<sup>b</sup> Crystal data for **3h**: C<sub>16</sub>H<sub>16</sub>O<sub>2</sub>, *M* = 240.29, triclinic, *a* = 7.3745(19) Å, *b* = 8.763(3) Å, *c* = 10.395(2) Å,  $\alpha$  = 99.79(2)°,  $\beta$  = 110.27(2)°,  $\gamma$  = 98.47(3)°, *V* = 605.3(3) Å<sup>3</sup>, *T* = 100 K, space group *P*1, *Z* = 2,  $\mu$ (MoK $\alpha$ ) = 0.086 mm<sup>-1</sup>, 11977 reflections measured, 4896 independent reflections ( $R_{int}$  = 0.0273). The final  $R_1$  values were 0.046 ( $I > 2\sigma(I)$ ). The final  $wR(F^2)$  values were 0.134 (all data). The goodness of fit on  $F^2$  was 1.043. CCDC reference number: 797429.

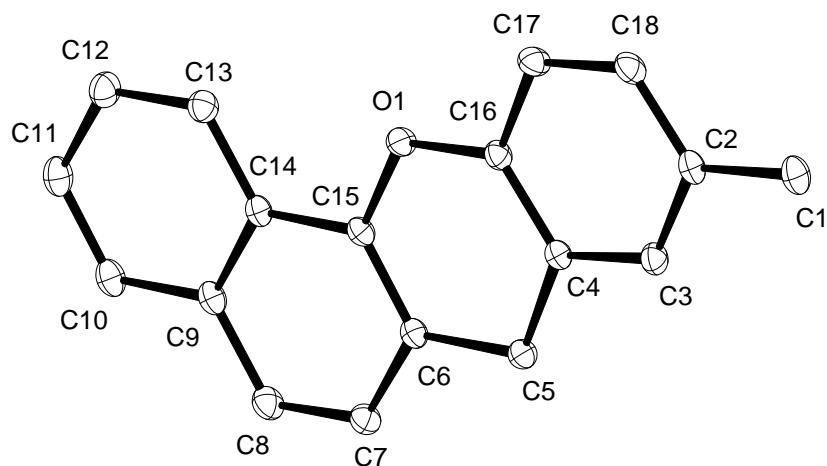

<sup>a</sup> Crystal data for **3j**: C<sub>18</sub>H<sub>14</sub>O, *M* = 246.29, monoclinic, *a* = 4.7615(5) Å, *b* = 11.9406(12) Å, *c* = 21.373(2) Å,  $\beta$  = 93.296(2)°, *V* = 1213.1(2) Å<sup>3</sup>, *T* = 100 K, space group *P*2<sub>1</sub>/*c*, *Z* = 4,  $\mu$ (Mo-K $\alpha$ ) = 0.082 mm<sup>-1</sup>, 69156 reflections measured, 5495 independent reflections ( $R_{int}$  = 0.0768). The final  $R_1$  values were 0.045 ( $I > 2\sigma(I)$ ). The final  $wR(F^2)$  values were 0.136 (all data). The goodness of fit on  $F^2$  was 1.037. CCDC reference number: 797428.

## Optimization studies

Given are isolated yields. All reactions were performed by refluxing in an oil bath for 24 hours unless noted otherwise.

### Screening of catalysts

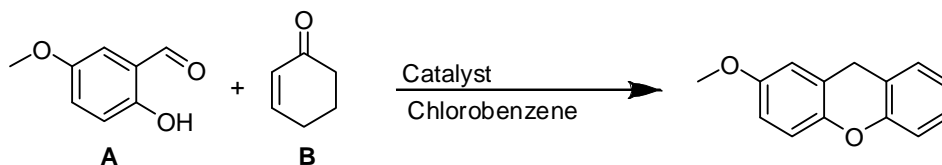

| Run | Catalyst loading | Catalyst                          | Solvent       | Equivalents<br>A : B | Yield % |
|-----|------------------|-----------------------------------|---------------|----------------------|---------|
| 1   | 20 mol %         | -                                 | chlorobenzene | 1 : 1                | 0       |
| 2   | 20 mol %         | ZnCl <sub>2</sub>                 | chlorobenzene | 1 : 1                | 50      |
| 3   | 20 mol %         | Zn(OTf) <sub>2</sub>              | chlorobenzene | 1 : 1                | 23      |
| 4   | 20 mol %         | Sc(OTf) <sub>3</sub>              | chlorobenzene | 1 : 1                | 55      |
| 5   | 20 mol %         | Yb(OTf) <sub>3</sub>              | chlorobenzene | 1 : 1                | 40      |
| 6   | 20 mol %         | Y(OTf) <sub>3</sub>               | chlorobenzene | 1 : 1                | 22      |
| 7   | 20 mol %         | Er(OTf) <sub>3</sub>              | chlorobenzene | 1 : 1                | 42      |
| 8   | 20 mol %         | Sm(OTf) <sub>3</sub>              | chlorobenzene | 1 : 1                | 23      |
| 9   | 20 mol %         | Cu(OTf) <sub>2</sub>              | chlorobenzene | 1 : 1                | 23      |
| 10  | 20 mol %         | CF <sub>3</sub> SO <sub>3</sub> H | chlorobenzene | 1 : 1                | 9       |

### Optimization of catalyst loading

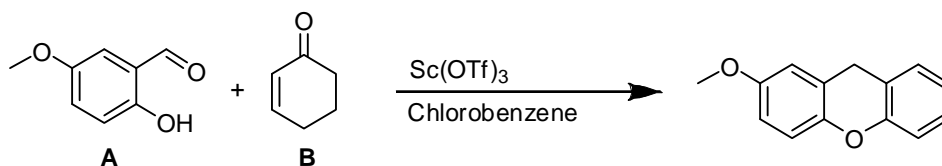

| Run | Catalyst loading | Solvent       | Equivalents<br>A : B | Yield % |
|-----|------------------|---------------|----------------------|---------|
| 1   | 5 mol %          | chlorobenzene | 1 : 1                | 59      |
| 2   | 10 mol %         | chlorobenzene | 1 : 1                | 47      |
| 3   | 15 mol %         | chlorobenzene | 1 : 1                | 55      |
| 4   | 3 mol %          | chlorobenzene | 1 : 1                | 48      |
| 5   | 20 mol %         | chlorobenzene | 1 : 1                | 55      |

*solvent screening*

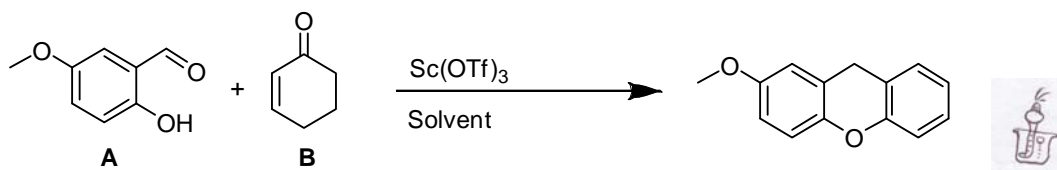

| Run | Catalyst loading | Solvent        | Equivalents<br>A : B | Yield % |
|-----|------------------|----------------|----------------------|---------|
| 1   | 5 mol %          | chlorobenzene  | 1 : 1                | 59      |
| 2   | 5 mol %          | toluene        | 1 : 1                | 40      |
| 3   | 5 mol %          | iso-hexane     | 1 : 1                | 7       |
| 4   | 5 mol %          | dichloroethane | 1 : 1                | 9       |

*Equivalents Screening*

| Run | Catalyst loading | Solvent       | Equivalents<br>A : B | Yield % |
|-----|------------------|---------------|----------------------|---------|
| 1   | 5 mol %          | chlorobenzene | 1.5 : 1              | 61      |
| 2   | 5 mol %          | chlorobenzene | 1 : 1.5              | 54      |
| 3   | 5 mol %          | chlorobenzene | 1.25 : 1             | 59      |
| 4   | 5 mol %          | chlorobenzene | 1.10 : 1             | 63      |

Optimal conditions for the Xanthene derivative synthesis are 5 mol % catalyst loading using chlorobenzene as solvent and a slight excess of the aldehyde.

*Reaction with 1,4-cyclohexanedione*

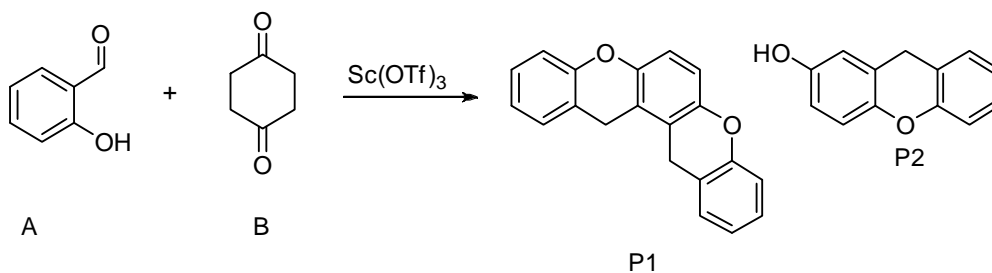

| Equivalents<br>A : B | Catalyst loading | Solvent       | Yield % GP A<br>(oil bath) | Yield % GP B<br>(microwave) |
|----------------------|------------------|---------------|----------------------------|-----------------------------|
| 1.1 : 1              | 5 mol %          | chlorobenzene | P1 (7)<br>P2 (25)          | P1 (5)<br>P2 (51)           |



*Effect of molecular sieves*

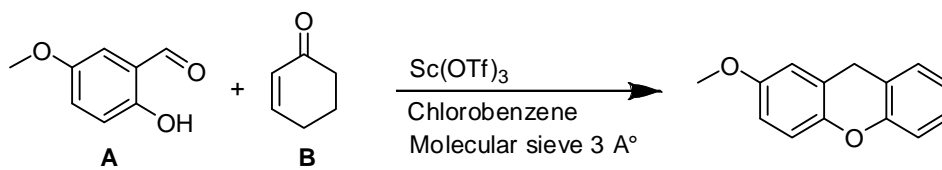

\* Using reactions conditions of general procedure **A**, plus addition of molecular sieves (3Å, 0.5 g). Isolated yield after 24 h was 6 %.
